# Supplementary material
Source: PubMed Central journal article supplement (PMC5159764)
Supplement: ejhg2016129x1.pdf [file ejhg2016129x1.pdf]

**Supplementary Table S1.** Set of 1,964 CPDs from 684 protein-coding genes identified in this study.

| <b>HGMD identifier</b> | <b>dbSNP identifier</b> | <b>Gene Symbol</b> | <b>Protein Change</b> |
|------------------------|-------------------------|--------------------|-----------------------|
| CM125782               | rs139767853             | <i>NPHP4</i>       | p.A1110V              |
| CM051581               | rs41280798              | <i>NPHP4</i>       | p.A1098T              |
| CM077956               | rs143020939             | <i>NPHP4</i>       | p.V1061I              |
| CM125781               | rs375819124             | <i>NPHP4</i>       | p.R1044H              |
| CM051579               |                         | <i>NPHP4</i>       | p.T946A               |
| CM125787               | rs199992272             | <i>NPHP4</i>       | p.R906C               |
| CM051578               |                         | <i>NPHP4</i>       | p.H782Q               |
| CM051576               |                         | <i>NPHP4</i>       | p.Q766R               |
| CM051573               | rs199891059             | <i>NPHP4</i>       | p.T627M               |
| CM051569               | rs201065230             | <i>NPHP4</i>       | p.F91L                |
| CM061884               | rs137853051             | <i>PARK7</i>       | p.A39S                |
| CM127783               |                         | <i>NMNAT1</i>      | p.A147P               |
| CM127785               |                         | <i>NMNAT1</i>      | p.Y181C               |
| CM091848               | rs80356718              | <i>TARDBP</i>      | p.N267S               |
| CM100585               |                         | <i>TARDBP</i>      | p.S292N               |

|           |             |                |         |
|-----------|-------------|----------------|---------|
| CM091313  | rs367543041 | <i>TARDBP</i>  | p.A382P |
| CM081833  | rs80356742  | <i>TARDBP</i>  | p.N390S |
| CM109498  | rs61757261  | <i>NPPA</i>    | p.S64R  |
| CM101956  | rs144860227 | <i>MFN2</i>    | p.A716T |
| CM080170  | rs540753875 | <i>CTRC</i>    | p.D260N |
| CM098007  | rs145515028 | <i>ATP13A2</i> | p.A249V |
| CM120069  |             | <i>SDHB</i>    | p.N120S |
| CM121098  |             | <i>SDHB</i>    | p.T17A  |
| CM132431  |             | <i>PINK1</i>   | p.P52L  |
| CM1212783 |             | <i>PINK1</i>   | p.R68P  |
| CM081737  | rs45604240  | <i>PINK1</i>   | p.T145M |
| CM076379  | rs543939499 | <i>PINK1</i>   | p.G193R |
| HM090029  |             | <i>PINK1</i>   | p.R207Q |
| CM066966  | rs34677717  | <i>PINK1</i>   | p.P209L |
| CM1212780 |             | <i>PINK1</i>   | p.R263G |
| CM104261  |             | <i>PINK1</i>   | p.L278V |
| CM065379  | rs45515602  | <i>PINK1</i>   | p.A383T |
| CM065380  | rs45478900  | <i>PINK1</i>   | p.G411S |

|           |             |               |         |
|-----------|-------------|---------------|---------|
| CM1212782 |             | <i>PINK1</i>  | p.V482M |
| CM083015  |             | <i>PINK1</i>  | p.N542S |
| CM065383  |             | <i>PINK1</i>  | p.C575R |
| CM980066  | rs199669988 | <i>ALPL</i>   | p.A177T |
| CM114829  |             | <i>SEPN1</i>  | p.E295K |
| CM013907  | rs202154574 | <i>NR0B2</i>  | p.G189E |
| CM000019  | rs74315320  | <i>GJB3</i>   | p.I141V |
| CM090826  | rs121908851 | <i>GJB3</i>   | p.N166S |
| CM013252  | rs369487110 | <i>COL8A2</i> | p.R304Q |
| CM083772  | rs121434397 | <i>PTCH2</i>  | p.R719Q |
| CM091154  |             | <i>PTCH2</i>  | p.V471I |
| CM041305  | rs113994023 | <i>EIF2B3</i> | p.Q136P |
| CM041304  | rs113994021 | <i>EIF2B3</i> | p.V46I  |
| CM024485  |             | <i>UROD</i>   | p.R120C |
| CM133457  |             | <i>UROD</i>   | p.T196I |
| CM961408  | rs116233118 | <i>UROD</i>   | p.G318R |
| CM099032  | rs138089183 | <i>MUTYH</i>  | p.R309C |
| CM076324  |             | <i>MUTYH</i>  | p.R185W |

|           |             |                |          |
|-----------|-------------|----------------|----------|
| CM083727  | rs79777494  | <i>MUTYH</i>   | p.P18L   |
| CM065096  | rs75939866  | <i>CPT2</i>    | p.A101V  |
| CM990439  |             | <i>CPT2</i>    | p.Y479F  |
| CM054797  |             | <i>PCSK9</i>   | p.R218S  |
| CM081395  | rs149489325 | <i>PCSK9</i>   | p.G236S  |
| CM066163  | rs374603772 | <i>PCSK9</i>   | p.R496W  |
| CM090077  |             | <i>ANGPTL3</i> | p.D41N   |
| CM090074  |             | <i>ANGPTL3</i> | p.R288Q  |
| CM993347  |             | <i>IL12RB2</i> | p.H720R  |
| CM920003  | rs398123072 | <i>ACADM</i>   | p.R53C   |
| CM086904  | rs121434406 | <i>RPL5</i>    | p.G140S  |
| CM0911024 |             | <i>ABCA4</i>   | p.K2172R |
| CM003580  | rs281865405 | <i>ABCA4</i>   | p.K2160R |
| CM970015  | rs1800552   | <i>ABCA4</i>   | p.R1898H |
| CM990064  | rs62646875  | <i>ABCA4</i>   | p.R1820P |
| CM015089  | rs61750563  | <i>ABCA4</i>   | p.V1693I |
| CM990050  | rs56357060  | <i>ABCA4</i>   | p.V1433I |
| CM003576  | rs61752432  | <i>ABCA4</i>   | p.V1429A |

|           |             |                |          |
|-----------|-------------|----------------|----------|
| CM012036  | rs61752424  | <i>ABCA4</i>   | p.T1253M |
| CM980006  | rs61750061  | <i>ABCA4</i>   | p.E1036K |
| HM080108  | rs143100856 | <i>ABCA4</i>   | p.Q841K  |
| CM040968  | rs139250920 | <i>ABCA4</i>   | p.T829M  |
| CM015074  | rs61749426  | <i>ABCA4</i>   | p.T716M  |
| CM043240  | rs61751393  | <i>ABCA4</i>   | p.P597S  |
| CM133420  | rs201117452 | <i>ABCA4</i>   | p.E432K  |
| CM003571  |             | <i>ABCA4</i>   | p.V424A  |
| CM003570  | rs61751264  | <i>ABCA4</i>   | p.A407V  |
| CM087701  | rs142231757 | <i>ABCA4</i>   | p.R333Q  |
| HM080093  | rs202198282 | <i>ABCA4</i>   | p.R187H  |
| CM003569  | rs62646863  | <i>ABCA4</i>   | p.I156V  |
| CM044611  |             | <i>DPYD</i>    | p.E615D  |
| CM1211237 |             | <i>EPS8L3</i>  | p.A8T    |
| CM003690  | rs80358222  | <i>SLC16A1</i> | p.K204E  |
| CM072105  | rs121918218 | <i>VANG1</i>   | p.V239I  |
| CM092862  |             | <i>PHGDH</i>   | p.A373T  |
| CM092865  | rs267606948 | <i>PHGDH</i>   | p.G377S  |

|           |             |               |         |
|-----------|-------------|---------------|---------|
| CM012381  | rs137852639 | <i>HMGCS2</i> | p.R500H |
| CM041361  | rs74315327  | <i>HFE2</i>   | p.L101P |
| CM1212301 |             | <i>GJA5</i>   | p.K107R |
| CM053899  |             | <i>GJA8</i>   | p.V64G  |
| CM093956  |             | <i>GJA8</i>   | p.S73F  |
| CM090039  |             | <i>ADAR</i>   | p.S915F |
| CM051380  |             | <i>ADAR</i>   | p.F609S |
| CM128078  |             | <i>ADAR</i>   | p.N386D |
| CM930293  | rs80356773  | <i>GBA</i>    | p.R535H |
| CM022015  | rs76071730  | <i>GBA</i>    | p.H490R |
| CM119326  |             | <i>GBA</i>    | p.M489L |
| CM094009  | rs75671029  | <i>GBA</i>    | p.D482N |
| CM900106  | rs1064651   | <i>GBA</i>    | p.D448H |
| CM960698  |             | <i>GBA</i>    | p.P426L |
| CM900104  | rs121908305 | <i>GBA</i>    | p.G364R |
| CM940810  |             | <i>GBA</i>    | p.R324C |
| CM068592  | rs199628072 | <i>GBA</i>    | p.T306I |
| CM090423  | rs140955685 | <i>GBA</i>    | p.R301H |

|          |             |             |         |
|----------|-------------|-------------|---------|
| CM910173 | rs381737    | <i>GBA</i>  | p.F252I |
| CM940807 | rs398123534 | <i>GBA</i>  | p.G241R |
| CM980833 | rs381427    | <i>GBA</i>  | p.V230G |
| CM960695 | rs364897    | <i>GBA</i>  | p.N227S |
| CM001166 | rs61748906  | <i>GBA</i>  | p.W223R |
| CM983510 | rs398123530 | <i>GBA</i>  | p.R170C |
| CM082772 |             | <i>GBA</i>  | p.R170S |
| CM960694 | rs397515515 | <i>GBA</i>  | p.R159W |
| CM950561 | rs1141814   | <i>GBA</i>  | p.R87W  |
| CM983509 | rs1141807   | <i>GBA</i>  | p.E80K  |
| CM081634 |             | <i>GBA</i>  | p.G49S  |
| HM080074 | rs201217064 | <i>PKLR</i> | p.E538D |
| CM971216 |             | <i>PKLR</i> | p.R518S |
| CM004202 | rs8177988   | <i>PKLR</i> | p.V506I |
| CM981557 |             | <i>PKLR</i> | p.A295V |
| CM061898 |             | <i>PKLR</i> | p.E266K |
| CM971205 |             | <i>PKLR</i> | p.E172Q |
| CM090468 |             | <i>PKLR</i> | p.G143S |

|           |             |               |         |
|-----------|-------------|---------------|---------|
| CM129596  | rs58327533  | <i>LMNA</i>   | p.R25C  |
| CM033628  | rs56694480  | <i>LMNA</i>   | p.L35V  |
| CM990974  | rs543320028 | <i>NTRK1</i>  | p.R85S  |
| CM941300  | rs199725919 | <i>SPTA1</i>  | p.G151D |
| CM092897  | rs137853074 | <i>KCNJ10</i> | p.R348C |
| CM1212552 | rs201293070 | <i>NCSTN</i>  | p.D185N |
| CM001311  |             | <i>PPOX</i>   | p.R138P |
| CM120103  | rs35086265  | <i>NDUFS2</i> | p.R323Q |
| CM103358  |             | <i>MPZ</i>    | p.G103W |
| CM950810  |             | <i>MPZ</i>    | p.W101C |
| CM092185  |             | <i>SDHC</i>   | p.I56F  |
| CM120071  |             | <i>SDHC</i>   | p.A66V  |
| CM056399  |             | <i>SDHC</i>   | p.R72C  |
| CM103068  |             | <i>F5</i>     | p.E694D |
| CM129719  |             | <i>FMO3</i>   | p.P70L  |
| CM073070  | rs186763441 | <i>FMO3</i>   | p.N114S |
| CM992887  | rs72549331  | <i>FMO3</i>   | p.R387L |
| CM981351  |             | <i>MYOC</i>   | p.R470C |



|           |             |                 |         |
|-----------|-------------|-----------------|---------|
| CM981350  | rs140967767 | <i>MYOC</i>     | p.A445V |
| CM032011  |             | <i>MYOC</i>     | p.T438I |
| CM023431  |             | <i>MYOC</i>     | p.G434S |
| CM001250  | rs74315338  | <i>MYOC</i>     | p.C433R |
| CM023430  |             | <i>MYOC</i>     | p.S393N |
| CM981344  | rs566289099 | <i>MYOC</i>     | p.T377M |
| CM971024  | rs74315330  | <i>MYOC</i>     | p.P370L |
| CM073213  |             | <i>MYOC</i>     | p.R346T |
| CM127618  |             | <i>MYOC</i>     | p.T209N |
| CM002376  | rs199746824 | <i>MYOC</i>     | p.R158Q |
| CM023962  | rs74315339  | <i>MYOC</i>     | p.Q48H  |
| CM032611  |             | <i>MYOC</i>     | p.C25R  |
| CM0910896 | rs199752860 | <i>MYOC</i>     | p.G12R  |
| CM930057  | rs121909568 | <i>SERPINC1</i> | p.A419V |
| CM010774  |             | <i>SERPINC1</i> | p.Y17S  |
| CM085598  |             | <i>NPHS2</i>    | p.F216Y |
| CM077312  |             | <i>NPHS2</i>    | p.A213T |
| CM077314  |             | <i>NPHS2</i>    | p.S211A |

|          |             |              |          |
|----------|-------------|--------------|----------|
| CM033931 | rs200587413 | <i>NPHS2</i> | p.A208T  |
| CM077320 |             | <i>NPHS2</i> | p.I192V  |
| CM077615 | rs559836164 | <i>NPHS2</i> | p.G42R   |
| CM042092 | rs561887984 | <i>NPHS2</i> | p.A29T   |
| CM077326 |             | <i>NPHS2</i> | p.R3G    |
| CM095681 | rs137854508 | <i>NCF2</i>  | p.A202V  |
| CM034304 | rs121434382 | <i>HMCN1</i> | p.Q5345R |
| CM054096 | rs141030117 | <i>RGS2</i>  | p.Q2R    |
| CM086802 |             | <i>CFH</i>   | p.R303Q  |
| CM103320 | rs148165372 | <i>CFH</i>   | p.V609I  |
| CM010316 | rs145975787 | <i>CFH</i>   | p.T956M  |
| CM045281 |             | <i>CFH</i>   | p.V1060A |
| CM010317 | rs62625015  | <i>CFH</i>   | p.Q1076E |
| CM109986 |             | <i>CFH</i>   | p.E1135D |
| CM114095 |             | <i>CFH</i>   | p.T1184A |
| CM050193 |             | <i>CFH</i>   | p.L1189F |
| CM024597 |             | <i>CFH</i>   | p.G1194D |
| CM103327 | rs318240756 | <i>CFHR5</i> | p.Y277N  |

|           |             |              |          |
|-----------|-------------|--------------|----------|
| CM103328  | rs111327589 | <i>CFHR5</i> | p.V379L  |
| CM053822  | rs137853138 | <i>CRB1</i>  | p.V162M  |
| CM056570  |             | <i>CRB1</i>  | p.F488S  |
| CM057652  |             | <i>CRB1</i>  | p.T654I  |
| CM992151  | rs62635654  | <i>CRB1</i>  | p.R764C  |
| CM012916  | rs62636290  | <i>CRB1</i>  | p.N894S  |
| CM113217  |             | <i>CRB1</i>  | p.H1035Y |
| CM119741  |             | <i>CRB1</i>  | p.P1305L |
| CM010805  | rs62636285  | <i>CRB1</i>  | p.R1331H |
| CM951222  | rs121964857 | <i>TNNT2</i> | p.R278C  |
| CM063210  | rs200754249 | <i>TNNT2</i> | p.A28V   |
| CM074094  | rs137852607 | <i>CHIT1</i> | p.E74K   |
| CM102671  |             | <i>KISS1</i> | p.P74S   |
| CM066539  |             | <i>CD46</i>  | p.E179Q  |
| CM062497  | rs35366573  | <i>CD46</i>  | p.A353V  |
| CM950745  | rs201223111 | <i>LAMB3</i> | p.P679L  |
| CM1010276 |             | <i>IRF6</i>  | p.Q82P   |
| CM133856  |             | <i>IRF6</i>  | p.A61V   |

|           |             |                |          |
|-----------|-------------|----------------|----------|
| CM045641  | rs111033275 | <i>USH2A</i>   | p.R4115C |
| CM124871  | rs368681648 | <i>USH2A</i>   | p.R2460H |
| CM065510  | rs201386640 | <i>USH2A</i>   | p.R2354H |
| CM001375  | rs373599651 | <i>USH2A</i>   | p.T1515M |
| CM071128  | rs201709513 | <i>USH2A</i>   | p.S1369L |
| CM080594  |             | <i>USH2A</i>   | p.R303C  |
| CM118851  | rs144147839 | <i>ADCK3</i>   | p.Y429C  |
| CM081295  | rs577325764 | <i>GJC2</i>    | p.G149S  |
| CM103399  |             | <i>GJC2</i>    | p.P316L  |
| CM118339  | rs199657441 | <i>HIST3H3</i> | p.R130C  |
| CM034508  | rs367543051 | <i>ACTA1</i>   | p.E243K  |
| CM041993  |             | <i>ACTA1</i>   | p.G199S  |
| CM1110852 | rs144261004 | <i>LYST</i>    | p.S857C  |
| CM043077  |             | <i>RYR2</i>    | p.A2403T |
| CM097935  |             | <i>RYR2</i>    | p.M3972I |
| CM056385  | rs189345192 | <i>RYR2</i>    | p.A4556T |
| CM013709  | rs61736331  | <i>EXO1</i>    | p.P640A  |
| CM016268  | rs61736331  | <i>EXO1</i>    | p.P640S  |

|          |             |              |          |
|----------|-------------|--------------|----------|
| CM013711 | rs200622305 | <i>EXO1</i>  | p.P770L  |
| CM082977 | rs180177487 | <i>NLRP3</i> | p.C150Y  |
| CM068199 | rs180177464 | <i>NLRP3</i> | p.R170Q  |
| CM013246 | rs121908147 | <i>NLRP3</i> | p.V200M  |
| CM108153 | rs180177501 | <i>NLRP3</i> | p.I315V  |
| CM077614 | rs180177474 | <i>NLRP3</i> | p.A497V  |
| CM060240 | rs180177461 | <i>NLRP3</i> | p.T559A  |
| CM024371 | rs146351101 | <i>TPO</i>   | p.V839I  |
| CM104783 | rs72654426  | <i>APOB</i>  | p.S4430T |
| CM055089 | rs12720843  | <i>APOB</i>  | p.V4394A |
| CM055088 | rs533755016 | <i>APOB</i>  | p.R4385H |
| CM125433 |             | <i>APOB</i>  | p.R4385C |
| CM043965 | rs201736972 | <i>APOB</i>  | p.H3570Y |
| CM077505 | rs368278927 | <i>APOB</i>  | p.T3567M |
| CM015396 |             | <i>APOB</i>  | p.R3507W |
| CM129216 |             | <i>APOB</i>  | p.A3426V |
| CM105025 |             | <i>APOB</i>  | p.I2877M |
| CM105023 |             | <i>APOB</i>  | p.M2358I |

|           |             |                |          |
|-----------|-------------|----------------|----------|
| CM104755  | rs141641980 | <i>APOB</i>    | p.R2219C |
| CM040371  | rs12713843  | <i>APOB</i>    | p.R1128H |
| CM067451  | rs141309351 | <i>POMC</i>    | p.A195T  |
| CM067448  | rs8192606   | <i>POMC</i>    | p.P132A  |
| CM014215  |             | <i>POMC</i>    | p.S7T    |
| CM091233  | rs368790049 | <i>OTOF</i>    | p.R1939W |
| CM065364  | rs80356601  | <i>OTOF</i>    | p.R1520Q |
| CM103492  | rs181805996 | <i>OTOF</i>    | p.D398E  |
| CM061856  | rs121909723 | <i>MPV17</i>   | p.R50W   |
| CM041307  | rs113994028 | <i>EIF2B4</i>  | p.R208Q  |
| CM120210  | rs199910872 | <i>GCKR</i>    | p.I500S  |
| CM061215  | rs573642949 | <i>SPAST</i>   | p.E43Q   |
| CM004657  | rs121908515 | <i>SPAST</i>   | p.S44L   |
| CM128855  |             | <i>SPAST</i>   | p.A95T   |
| CM042482  |             | <i>SPAST</i>   | p.P361L  |
| CM022254  |             | <i>SPAST</i>   | p.R562Q  |
| CM1212215 |             | <i>SPAST</i>   | p.S597G  |
| CM072975  |             | <i>CYP11B1</i> | p.N498D  |

|           |             |               |         |
|-----------|-------------|---------------|---------|
| CM060950  |             | <i>CYP1B1</i> | p.A388T |
| CM020105  | rs66583685  | <i>CYP1B1</i> | p.L345F |
| CM087793  |             | <i>CYP1B1</i> | p.N319S |
| HM0665    |             | <i>CYP1B1</i> | p.E230K |
| CM014341  | rs59472972  | <i>CYP1B1</i> | p.V198I |
| CM091788  |             | <i>CYP1B1</i> | p.L177P |
| CM066029  |             | <i>CYP1B1</i> | p.Q144H |
| CM012312  |             | <i>ABCG8</i>  | p.R184H |
| HM090053  | rs149813423 | <i>SLC3A1</i> | p.R81C  |
| CM941279  | rs121912694 | <i>SLC3A1</i> | p.R181Q |
| CM003777  | rs187962930 | <i>SLC3A1</i> | p.I445T |
| CM941283  | rs121912695 | <i>SLC3A1</i> | p.T652R |
| CM086940  | rs199823175 | <i>SIX3</i>   | p.G37C  |
| CM086949  |             | <i>SIX3</i>   | p.S114L |
| CM021303  | rs63750285  | <i>MSH2</i>   | p.A45V  |
| CM1210408 |             | <i>MSH2</i>   | p.E56K  |
| CM052904  | rs63750381  | <i>MSH2</i>   | p.D283Y |
| CM994126  | rs63751062  | <i>MSH2</i>   | p.P336S |

|          |             |                |          |
|----------|-------------|----------------|----------|
| CM022428 | rs63751617  | <i>MSH2</i>    | p.R359S  |
| CM034047 | rs63750006  | <i>MSH2</i>    | p.Q419K  |
| CM023958 | rs55778204  | <i>MSH2</i>    | p.T564A  |
| CM065320 | rs63750280  | <i>MSH2</i>    | p.P622T  |
| CM101612 |             | <i>MSH2</i>    | p.E701K  |
| CM960992 |             | <i>MSH2</i>    | p.T905R  |
| HM030034 | rs267608023 | <i>MSH2</i>    | p.K931T  |
| CM015302 | rs34374438  | <i>MSH6</i>    | p.K854M  |
| CM003462 | rs63749889  | <i>MSH6</i>    | p.R901H  |
| CM053212 |             | <i>DYSF</i>    | p.G299E  |
| CM116694 | rs148541407 | <i>DYSF</i>    | p.R1717W |
| CM123554 |             | <i>DYSF</i>    | p.I1980K |
| CM012475 | rs104893665 | <i>SPR</i>     | p.R150G  |
| CM950633 | rs145124653 | <i>HK2</i>     | p.R497Q  |
| CM116346 |             | <i>TMEM127</i> | p.G185R  |
| CM109012 | rs121908820 | <i>TMEM127</i> | p.G73R   |
| CM014549 | rs373954146 | <i>CNGA3</i>   | p.N471S  |
| CM071619 |             | <i>CNGA3</i>   | p.A621E  |



|          |             |               |         |
|----------|-------------|---------------|---------|
| CM090148 | rs121434502 | <i>RANBP2</i> | p.T585M |
| CM090150 | rs121434504 | <i>RANBP2</i> | p.I656V |
| CM113165 | rs201460398 | <i>MERTK</i>  | p.P958L |
| CM132983 | rs199932303 | <i>IL36RN</i> | p.R102W |
| CM014371 |             | <i>PAX8</i>   | p.R31C  |
| CM065144 | rs115481013 | <i>ERCC3</i>  | p.K449R |
| CM065145 | rs201383161 | <i>ERCC3</i>  | p.T232A |
| CM128560 | rs146793243 | <i>PROC</i>   | p.G18S  |
| CM920593 | rs121918149 | <i>PROC</i>   | p.V76M  |
| CM128562 |             | <i>PROC</i>   | p.G107R |
| CM950988 | rs200234655 | <i>PROC</i>   | p.H108N |
| CM014374 |             | <i>PROC</i>   | p.S124R |
| CM910310 |             | <i>PROC</i>   | p.S161R |
| CM092268 |             | <i>PROC</i>   | p.R194H |
| CM910315 | rs121918152 | <i>PROC</i>   | p.R220W |
| CM910314 | rs121918153 | <i>PROC</i>   | p.R220Q |
| CM005571 | rs370086431 | <i>PROC</i>   | p.K235Q |
| CM951010 | rs568121876 | <i>PROC</i>   | p.A251V |

|           |             |               |          |
|-----------|-------------|---------------|----------|
| CM036050  |             | <i>PROC</i>   | p.Y268H  |
| CM920595  | rs121918146 | <i>PROC</i>   | p.A309T  |
| CM951024  |             | <i>PROC</i>   | p.L360F  |
| CM961160  |             | <i>PROC</i>   | p.N371T  |
| CM941190  |             | <i>PROC</i>   | p.G392R  |
| CM961163  |             | <i>PROC</i>   | p.F410S  |
| CM951033  |             | <i>PROC</i>   | p.N431K  |
| CM951038  |             | <i>PROC</i>   | p.R440H  |
| CM133672  |             | <i>DARS</i>   | p.D367Y  |
| CM086705  |             | <i>CACNB4</i> | p.R468Q  |
| CM110659  | rs137926033 | <i>TTC21B</i> | p.Q869R  |
| CM110657  |             | <i>TTC21B</i> | p.M844V  |
| CM110661  |             | <i>TTC21B</i> | p.S591N  |
| CM110666  | rs185089786 | <i>TTC21B</i> | p.R411G  |
| CM096166  |             | <i>SCN1A</i>  | p.L1677F |
| CM072001  | rs121917976 | <i>SCN1A</i>  | p.R1645Q |
| CM1211385 | rs566081370 | <i>SCN1A</i>  | p.R1213Q |
| CM076496  | rs121918799 | <i>SCN1A</i>  | p.T1174S |

|          |             |                |          |
|----------|-------------|----------------|----------|
| CM083093 |             | <i>SCN1A</i>   | p.N935H  |
| CM120569 | rs200328637 | <i>SCN9A</i>   | p.M1532I |
| CM133903 | rs200488448 | <i>ABCB11</i>  | p.R928Q  |
| CM994533 |             | <i>ABCB11</i>  | p.C336S  |
| CM094020 | rs77934668  | <i>PDE11A</i>  | p.D609N  |
| CM054117 | rs104893664 | <i>SLC40A1</i> | p.G267D  |
| CM132752 | rs41473544  | <i>STAT1</i>   | p.V266I  |
| CM990324 | rs17860403  | <i>CASP10</i>  | p.L285F  |
| CM085233 |             | <i>ALS2</i>    | p.Q435L  |
| CM085275 |             | <i>BMPR2</i>   | p.G83R   |
| CM044857 |             | <i>BMPR2</i>   | p.M186V  |
| CM072969 | rs28931605  | <i>CRYGD</i>   | p.P24S   |
| CM063936 | rs142693704 | <i>CPS1</i>    | p.A640S  |
| CM071659 | rs141373204 | <i>CPS1</i>    | p.I1215V |
| CM980211 |             | <i>BARD1</i>   | p.Q564H  |
| CM034383 |             | <i>BARD1</i>   | p.N470S  |
| CM021948 |             | <i>BARD1</i>   | p.N295S  |
| CM130512 | rs147218173 | <i>ABCA12</i>  | p.N678S  |

|           |             |                 |          |
|-----------|-------------|-----------------|----------|
| CM130514  | rs368135271 | <i>ABCA12</i>   | p.E482D  |
| CM062371  |             | <i>ABCA12</i>   | p.S387N  |
| CM071091  | rs142164846 | <i>SMARCAL1</i> | p.R476Q  |
| CM120215  | rs387906911 | <i>ABCB6</i>    | p.A57T   |
| CM105026  | rs267607495 | <i>DES</i>      | p.S12F   |
| CM065284  |             | <i>INHA</i>     | p.A182D  |
| CM004796  | rs12720062  | <i>INHA</i>     | p.A257T  |
| CM014042  | rs200672668 | <i>COL4A3</i>   | p.G640R  |
| CM034408  |             | <i>COL4A3</i>   | p.F1475S |
| CM1211781 | rs111395856 | <i>COL6A3</i>   | p.E2746K |
| CM1211784 | rs111389165 | <i>COL6A3</i>   | p.I1605V |
| CM050232  | rs138049094 | <i>COL6A3</i>   | p.N1467D |
| CM1211780 | rs112181324 | <i>COL6A3</i>   | p.A1373T |
| CM1211783 | rs111577719 | <i>COL6A3</i>   | p.R59Q   |
| CM101386  |             | <i>D2HGDH</i>   | p.A231V  |
| CM101392  |             | <i>D2HGDH</i>   | p.A446V  |
| CM041512  |             | <i>SUMF1</i>    | p.A177P  |
| CM041511  | rs200142963 | <i>SUMF1</i>    | p.L20F   |

|           |             |               |          |
|-----------|-------------|---------------|----------|
| CM1111468 |             | <i>OGG1</i>   | p.S280G  |
| CM014955  | rs121917786 | <i>FANCD2</i> | p.R1236H |
| CM1211793 | rs111284875 | <i>FBLN2</i>  | p.G917S  |
| CM000133  |             | <i>COLQ</i>   | p.R410Q  |
| CM051396  | rs397514337 | <i>BTB</i>    | p.H53Q   |
| CM993548  | rs146015592 | <i>BTB</i>    | p.R157H  |
| CM995314  | rs397514392 | <i>BTB</i>    | p.A299V  |
| CM000666  | rs397514422 | <i>BTB</i>    | p.W487R  |
| CM064329  | rs148665451 | <i>TGFBR2</i> | p.A329T  |
| CM930345  |             | <i>GLB1</i>   | p.E632G  |
| CM940869  | rs72555393  | <i>GLB1</i>   | p.T82M   |
| CM023644  | rs63751467  | <i>MLH1</i>   | p.N338S  |
| CM1210405 | rs141344760 | <i>MLH1</i>   | p.M383T  |
| CM044233  | rs63751485  | <i>MLH1</i>   | p.L400V  |
| CM1010261 |             | <i>MLH1</i>   | p.P403S  |
| CM046062  | rs63750443  | <i>MLH1</i>   | p.E433Q  |
| CM970965  | rs63750365  | <i>MLH1</i>   | p.A441T  |
| CM994125  | rs63750956  | <i>MLH1</i>   | p.D485E  |

|          |             |              |          |
|----------|-------------|--------------|----------|
| CM960969 | rs63751145  | <i>MLH1</i>  | p.A492T  |
| CM068558 | rs63751270  | <i>MLH1</i>  | p.N635S  |
| CM023747 | rs55907433  | <i>MLH1</i>  | p.I655V  |
| HM971468 | rs140195825 | <i>MLH1</i>  | p.K751R  |
| CM087570 | rs3733139   | <i>ITGA9</i> | p.G404S  |
| CM055525 | rs199473331 | <i>SCN5A</i> | p.R1958Q |
| CM087610 | rs41315493  | <i>SCN5A</i> | p.V1951M |
| CM058053 | rs199473637 | <i>SCN5A</i> | p.G1935S |
| CM097681 | rs199473290 | <i>SCN5A</i> | p.L1650F |
| CM100744 | rs199473280 | <i>SCN5A</i> | p.V1604M |
| CM100728 | rs199473250 | <i>SCN5A</i> | p.I1448L |
| CM127051 |             | <i>SCN5A</i> | p.N1269S |
| CM002388 | rs199473195 | <i>SCN5A</i> | p.D1114N |
| CM085685 | rs199473190 | <i>SCN5A</i> | p.G1084S |
| CM054857 | rs199473592 | <i>SCN5A</i> | p.R1023H |
| CM099709 | rs199473184 | <i>SCN5A</i> | p.P1008S |
| CM014388 | rs137854609 | <i>SCN5A</i> | p.A997S  |
| CM100685 | rs137854609 | <i>SCN5A</i> | p.A997T  |

|          |             |                 |         |
|----------|-------------|-----------------|---------|
| CM096513 | rs41311135  | <i>SCN5A</i>    | p.R975W |
| CM055529 | rs61737825  | <i>SCN5A</i>    | p.R971C |
| CM030273 | rs45553235  | <i>SCN5A</i>    | p.Q692K |
| CM044058 | rs199473146 | <i>SCN5A</i>    | p.A691T |
| CM057209 | rs199473145 | <i>SCN5A</i>    | p.R689H |
| CM070260 | rs199473142 | <i>SCN5A</i>    | p.R680H |
| CM097645 | rs199473136 | <i>SCN5A</i>    | p.G639R |
| CM064256 | rs199473136 | <i>SCN5A</i>    | p.G639R |
| CM097644 | rs36210423  | <i>SCN5A</i>    | p.A572V |
| CM031354 | rs199473118 | <i>SCN5A</i>    | p.T512I |
| CM100644 | rs199473088 | <i>SCN5A</i>    | p.V300I |
| CM107405 | rs199473555 | <i>SCN5A</i>    | p.V113I |
| CM097619 | rs199473049 | <i>SCN5A</i>    | p.R53Q  |
| CM097617 | rs199473048 | <i>SCN5A</i>    | p.E48K  |
| CM129998 | rs562675882 | <i>SCN5A</i>    | p.A29V  |
| CM064257 | rs199473043 | <i>SCN5A</i>    | p.G9V   |
| CM093166 | rs121918331 | <i>SLC25A38</i> | p.R187P |
| CM074606 | rs72556555  | <i>TREX1</i>    | p.R240S |

|           |             |               |          |
|-----------|-------------|---------------|----------|
| CM070880  | rs150903058 | <i>COL7A1</i> | p.R2927H |
| CM112250  |             | <i>COL7A1</i> | p.G2517D |
| CM070877  |             | <i>COL7A1</i> | p.P2438L |
| CM970381  | rs121912849 | <i>COL7A1</i> | p.R2063W |
| CM094899  |             | <i>COL7A1</i> | p.V1627I |
| CM060932  |             | <i>COL7A1</i> | p.G923R  |
| CM071637  |             | <i>COL7A1</i> | p.V760M  |
| CM122651  | rs200550585 | <i>AMT</i>    | p.D197H  |
| CM133829  |             | <i>IL17RD</i> | p.A735V  |
| CM1110145 |             | <i>HESX1</i>  | p.R160H  |
| CM132255  |             | <i>HESX1</i>  | p.V75L   |
| CM132254  |             | <i>HESX1</i>  | p.H42Y   |
| CM010054  | rs121909173 | <i>HESX1</i>  | p.Q6H    |
| CM950797  | rs104893747 | <i>MITF</i>   | p.S298P  |
| CM083835  |             | <i>PROK2</i>  | p.A24P   |
| CM101820  | rs63750818  | <i>CHMP2B</i> | p.I29V   |
| CM080145  | rs63750944  | <i>CHMP2B</i> | p.N143S  |
| CM128596  | rs139479630 | <i>PROS1</i>  | p.N583H  |



|          |             |              |         |
|----------|-------------|--------------|---------|
| CM992961 |             | <i>PROSI</i> | p.I562L |
| CM036053 |             | <i>PROSI</i> | p.L551V |
| CM951054 |             | <i>PROSI</i> | p.D376N |
| CM941197 | rs121918474 | <i>PROSI</i> | p.K196E |
| CM951047 | rs146366248 | <i>PROSI</i> | p.T144N |
| CM011768 | rs28931603  | <i>CPOX</i>  | p.R447C |
| CM080129 |             | <i>CBLB</i>  | p.T882A |
| CM074083 | rs119477056 | <i>CD96</i>  | p.T280M |
| CM110962 |             | <i>ILDR1</i> | p.R453Q |
| CM962438 |             | <i>CASR</i>  | p.D215G |
| CM021964 | rs62269092  | <i>CASR</i>  | p.E250K |
| CM910329 | rs104893771 | <i>RHO</i>   | p.V87D  |
| CM961252 |             | <i>RHO</i>   | p.V137M |
| CM121646 |             | <i>RHO</i>   | p.M216L |
| CM032016 |             | <i>NPHP3</i> | p.R397H |
| CM077305 | rs145643112 | <i>NPHP3</i> | p.A52T  |
| CM001038 | rs104893685 | <i>BFSP2</i> | p.R287W |
| CM112226 |             | <i>TF</i>    | p.N630T |

|           |             |               |         |
|-----------|-------------|---------------|---------|
| CM1110009 | rs145135400 | <i>PCCB</i>   | p.T451I |
| CM118816  | rs201408725 | <i>GFM1</i>   | p.R671C |
| CM060484  | rs104893806 | <i>SOX2</i>   | p.N46K  |
| CM041314  | rs113994047 | <i>EIF2B5</i> | p.E81K  |
| CM013534  | rs113994049 | <i>EIF2B5</i> | p.R113H |
| CM092133  |             | <i>EIF2B5</i> | p.N376D |
| CM041323  | rs113994073 | <i>EIF2B5</i> | p.I385V |
| CM117023  | rs111290936 | <i>EIF4G1</i> | p.A502V |
| CM115430  |             | <i>CLCN2</i>  | p.S758N |
| CM115428  | rs144412275 | <i>CLCN2</i>  | p.R73H  |
| CM107729  |             | <i>MASP1</i>  | p.G687R |
| CM085325  |             | <i>CLDN16</i> | p.G88E  |
| CM085322  |             | <i>CLDN16</i> | p.S110R |
| CM113553  |             | <i>IDUA</i>   | p.T103P |
| CM066084  | rs121913116 | <i>FGFR3</i>  | p.S84L  |
| CM960655  | rs4647924   | <i>FGFR3</i>  | p.P250R |
| CM950472  | rs75790268  | <i>FGFR3</i>  | p.G375C |
| CM061001  | rs121913112 | <i>FGFR3</i>  | p.D513N |

|           |             |               |         |
|-----------|-------------|---------------|---------|
| CM970530  | rs80053154  | <i>FGFR3</i>  | p.I538V |
| CM063958  | rs118203994 | <i>DOK7</i>   | p.G180A |
| CM012812  | rs369671890 | <i>WFS1</i>   | p.A58V  |
| CM073424  |             | <i>WFS1</i>   | p.V624A |
| CM031404  |             | <i>WFS1</i>   | p.R793P |
| CM061886  | rs104893856 | <i>PHOX2B</i> | p.G197D |
| CM984569  |             | <i>SGCB</i>   | p.N304S |
| CM971347  |             | <i>SGCB</i>   | p.Q11E  |
| CM950712  | rs143388949 | <i>KIT</i>    | p.M318V |
| CM078686  |             | <i>KIT</i>    | p.M541L |
| CM950716  |             | <i>KIT</i>    | p.H650P |
| CM100865  | rs182531866 | <i>GNRHR</i>  | p.R240Q |
| CM920015  | rs75002628  | <i>ALB</i>    | p.R242H |
| CM077244  | rs121918233 | <i>COQ2</i>   | p.S146N |
| CM971400  | rs104893877 | <i>SNCA</i>   | p.A53T  |
| CM040493  | rs104893875 | <i>SNCA</i>   | p.E46K  |
| CM091036  | rs121918124 | <i>TACR3</i>  | p.G93D  |
| CM1210593 | rs41278047  | <i>CFI</i>    | p.K441R |

|           |             |               |         |
|-----------|-------------|---------------|---------|
| CM076093  |             | <i>CFI</i>    | p.I433V |
| CM062507  | rs121964917 | <i>CFI</i>    | p.R317W |
| CM087192  | rs113273712 | <i>CFI</i>    | p.I306V |
| CM086396  |             | <i>CFI</i>    | p.Q250K |
| CM131612  |             | <i>CFI</i>    | p.H118R |
| CM109438  | rs377090638 | <i>CFI</i>    | p.T72S  |
| CM127705  |             | <i>CFI</i>    | p.G71V  |
| CM004057  |             | <i>PITX2</i>  | p.R90C  |
| CM109801  |             | <i>BBS12</i>  | p.R355Q |
| CM101930  |             | <i>BBS12</i>  | p.Y524C |
| CM120918  |             | <i>MFSD8</i>  | p.M470V |
| CM0910231 |             | <i>GYPA</i>   | p.V81G  |
| CM004555  | rs375241297 | <i>GYPA</i>   | p.R50W  |
| CM993938  |             | <i>FGG</i>    | p.N387K |
| CM024515  |             | <i>ETFDH</i>  | p.Y49C  |
| CM910010  | rs192195150 | <i>AGA</i>    | p.R161Q |
| CM041496  | rs199476185 | <i>CYP4V2</i> | p.E79D  |
| CM041498  | rs149684063 | <i>CYP4V2</i> | p.M123V |

|           |             |             |          |
|-----------|-------------|-------------|----------|
| CM076174  |             | <i>F11</i>  | p.V38A   |
| CM062619  |             | <i>F11</i>  | p.Q47H   |
| CM044881  | rs574509278 | <i>F11</i>  | p.L190P  |
| CM066064  |             | <i>F11</i>  | p.P206S  |
| CM0910289 |             | <i>F11</i>  | p.G235S  |
| CM062615  |             | <i>F11</i>  | p.R252S  |
| CM083501  | rs201688862 | <i>F11</i>  | p.R268H  |
| CM080237  | rs281875253 | <i>F11</i>  | p.T331I  |
| CM950374  | rs281875270 | <i>F11</i>  | p.E341K  |
| CM062623  | rs142096488 | <i>F11</i>  | p.G362R  |
| CM097410  | rs547842083 | <i>F11</i>  | p.A393V  |
| CM020683  | rs281875278 | <i>F11</i>  | p.Y511H  |
| CM002953  |             | <i>F11</i>  | p.K536N  |
| CM116664  |             | <i>TERT</i> | p.E1116Q |
| CM116663  |             | <i>TERT</i> | p.G1109R |
| CM086701  |             | <i>TERT</i> | p.L1019F |
| CM133992  |             | <i>TERT</i> | p.T567M  |
| CM0910920 | rs148798048 | <i>TERT</i> | p.G260D  |

|           |             |                |          |
|-----------|-------------|----------------|----------|
| BM1199409 |             | <i>TERT</i>    | p.E113V  |
| CM056407  | rs147837176 | <i>SLC6A3</i>  | p.E602G  |
| CM005507  | rs28364997  | <i>SLC6A3</i>  | p.A559V  |
| CM091931  |             | <i>DNAH5</i>   | p.N549D  |
| HM0679    | rs553073635 | <i>SLC45A2</i> | p.T302S  |
| CM113402  | rs37369     | <i>AGXT2</i>   | p.V140I  |
| CM071042  |             | <i>NIPBL</i>   | p.P2056S |
| CM119129  |             | <i>OSMR</i>    | p.K615N  |
| CM109128  |             | <i>OSMR</i>    | p.D647Y  |
| CM980284  | rs369349760 | <i>C7</i>      | p.R220Q  |
| CM980285  | rs541873000 | <i>C7</i>      | p.E682Q  |
| CM980286  | rs113187203 | <i>C7</i>      | p.R687H  |
| CM068405  |             | <i>GHR</i>     | p.H74R   |
| CM980905  | rs6413484   | <i>GHR</i>     | p.V162I  |
| CM068406  |             | <i>GHR</i>     | p.G166E  |
| CM950575  | rs45588036  | <i>GHR</i>     | p.E242D  |
| CM116520  |             | <i>ITGA2</i>   | p.T1116M |
| CM125726  | rs140806722 | <i>MCCC2</i>   | p.I200N  |

|           |             |                |          |
|-----------|-------------|----------------|----------|
| CM074028  | rs150087888 | <i>ARSB</i>    | p.R106H  |
| CM074018  |             | <i>ARSB</i>    | p.T92K   |
| CM080627  | rs549211166 | <i>WDR36</i>   | p.Y97C   |
| CM119558  | rs142407572 | <i>WDR36</i>   | p.L490M  |
| CM086770  |             | <i>APC</i>     | p.T828A  |
| CM080048  | rs147394539 | <i>APC</i>     | p.M949I  |
| CM992135  |             | <i>APC</i>     | p.A1184P |
| CM1010211 |             | <i>APC</i>     | p.M1211V |
| CM973704  |             | <i>APC</i>     | p.I1304V |
| CM086766  |             | <i>APC</i>     | p.I1307L |
| CM080037  |             | <i>APC</i>     | p.T1445A |
| CM080050  |             | <i>APC</i>     | p.I1572T |
| CM080047  |             | <i>APC</i>     | p.G1921S |
| CM080039  |             | <i>APC</i>     | p.I2541V |
| CM080036  | rs367676584 | <i>APC</i>     | p.N2593S |
| CM080066  | rs146115809 | <i>APC</i>     | p.I2756V |
| CM080057  | rs369264968 | <i>APC</i>     | p.A2795T |
| CM121731  |             | <i>ALDH7A1</i> | p.Y354C  |

|          |             |               |          |
|----------|-------------|---------------|----------|
| CM091479 | rs145259927 | <i>FBN2</i>   | p.G754S  |
| CM035597 | rs28942109  | <i>SAR1B</i>  | p.D137N  |
| CM065478 |             | <i>TGFBI</i>  | p.V113I  |
| CM096327 | rs188677757 | <i>TGFBI</i>  | p.M502V  |
| CM104953 |             | <i>TGFBI</i>  | p.S516R  |
| CM062013 | rs121909217 | <i>TGFBI</i>  | p.R666S  |
| CM081446 | rs576564400 | <i>SPINK1</i> | p.T69I   |
| CM016009 | rs141634296 | <i>SPINK1</i> | p.R65Q   |
| CM001343 | rs17107315  | <i>SPINK1</i> | p.N34S   |
| CM101889 | rs80359890  | <i>SH3TC2</i> | p.Y169H  |
| CM119165 |             | <i>NDST1</i>  | p.R709Q  |
| CM043783 | rs375688767 | <i>NIPAL4</i> | p.G297R  |
| CM117155 |             | <i>GABRG2</i> | p.R363Q  |
| CM071773 | rs121909341 | <i>FOXJ1</i>  | p.R267Q  |
| CM108634 | rs375086983 | <i>NKX2-5</i> | p.P283Q  |
| CM086881 | rs113818864 | <i>NKX2-5</i> | p.A42P   |
| CM043581 | rs104893936 | <i>SNCB</i>   | p.V70M   |
| CM032981 |             | <i>NSD1</i>   | p.P2227L |



|           |             |                |          |
|-----------|-------------|----------------|----------|
| CM114488  | rs183643295 | <i>F12</i>     | p.A343P  |
| BM1076232 |             | <i>LTC4S</i>   | p.G125D  |
| CM034451  |             | <i>SQSTM1</i>  | p.P387L  |
| CM103182  | rs138754417 | <i>F13A1</i>   | p.G593S  |
| CM099543  | rs143711562 | <i>F13A1</i>   | p.T577M  |
| CM103181  | rs367679357 | <i>F13A1</i>   | p.R541Q  |
| CM980654  | rs76451285  | <i>F13A1</i>   | p.A395V  |
| CM063961  | rs121912998 | <i>DSP</i>     | p.V30M   |
| CM101053  | rs142078450 | <i>DSP</i>     | p.R2541K |
| CM102900  |             | <i>TFAP2A</i>  | p.R255W  |
| CM095228  | rs72556347  | <i>TPMT</i>    | p.F208L  |
| CM074605  | rs74423290  | <i>TPMT</i>    | p.A167G  |
| CM033326  |             | <i>ALDH5A1</i> | p.P382L  |
| CM033969  |             | <i>HFE</i>     | p.R66C   |
| CM112342  |             | <i>HFE</i>     | p.R67C   |
| CM990721  | rs28934595  | <i>HFE</i>     | p.Q127H  |
| CM034097  | rs62625346  | <i>HFE</i>     | p.R224Q  |
| HM030028  | rs143175221 | <i>HFE</i>     | p.V295A  |

|           |             |                |          |
|-----------|-------------|----------------|----------|
| CM033604  | rs63749090  | <i>CYP21A2</i> | p.A16T   |
| CM128446  |             | <i>CYP21A2</i> | p.E141K  |
| CM119139  |             | <i>CYP21A2</i> | p.Y192H  |
| HM070087  |             | <i>CYP21A2</i> | p.R225W  |
| CM021255  | rs151344505 | <i>CYP21A2</i> | p.V305M  |
| CM1210497 |             | <i>CYP21A2</i> | p.R367C  |
| CM099830  |             | <i>CYP21A2</i> | p.N388K  |
| CM920233  | rs6445      | <i>CYP21A2</i> | p.P454S  |
| CM971292  | rs62645936  | <i>PRPH2</i>   | p.V268I  |
| CM930639  | rs61755792  | <i>PRPH2</i>   | p.R172W  |
| CM090728  | rs563581127 | <i>PRPH2</i>   | p.R123W  |
| CM951113  | rs61755767  | <i>PRPH2</i>   | p.I32V   |
| CM087246  | rs143297472 | <i>CD2AP</i>   | p.M496I  |
| CM126884  |             | <i>MUT</i>     | p.P615L  |
| CM050667  | rs115923556 | <i>MUT</i>     | p.I69V   |
| CM051189  | rs78518523  | <i>PKHD1</i>   | p.M3642I |
| CM051190  |             | <i>PKHD1</i>   | p.M3642T |
| CM051188  |             | <i>PKHD1</i>   | p.P3602L |

|           |             |               |          |
|-----------|-------------|---------------|----------|
| CM034282  |             | <i>PKHD1</i>  | p.I3167L |
| CM034279  |             | <i>PKHD1</i>  | p.Y2863C |
| CM034278  | rs150925674 | <i>PKHD1</i>  | p.S2861G |
| CM032320  | rs201105958 | <i>PKHD1</i>  | p.S1833L |
| CM100426  | rs141103838 | <i>PKHD1</i>  | p.G1712R |
| CM051133  | rs115045643 | <i>PKHD1</i>  | p.P676R  |
| CM051126  | rs149781976 | <i>PKHD1</i>  | p.G448R  |
| CM076019  |             | <i>BCKDHB</i> | p.P123L  |
| CM032854  |             | <i>BCKDHB</i> | p.G135R  |
| CM122022  | rs371518124 | <i>BCKDHB</i> | p.R170H  |
| CM055950  |             | <i>GJA1</i>   | p.S251T  |
| CM055953  |             | <i>GJA1</i>   | p.A253P  |
| CM910048  | rs104893942 | <i>ARG1</i>   | p.T290S  |
| CM994048  | rs190947144 | <i>ENPP1</i>  | p.S287F  |
| CM108234  | rs563655306 | <i>CITED2</i> | p.S192G  |
| CM103662  | rs145347140 | <i>STX11</i>  | p.E206K  |
| CM1111579 | rs560006390 | <i>STX11</i>  | p.F281C  |
| CM082615  |             | <i>EPM2A</i>  | p.E210K  |

|          |             |               |         |
|----------|-------------|---------------|---------|
| CM103338 | rs267607101 | <i>TAB2</i>   | p.P208S |
| CM961133 | rs181030365 | <i>PLG</i>    | p.D695N |
| CM056983 | rs55830907  | <i>PARK2</i>  | p.R402C |
| CM103387 | rs200239028 | <i>PARK2</i>  | p.R128K |
| CM066956 | rs577232474 | <i>PARK2</i>  | p.R42C  |
| CM030923 | rs147757966 | <i>PARK2</i>  | p.R33Q  |
| HM070042 | rs146288080 | <i>PARK2</i>  | p.D18N  |
| CM122512 | rs281875334 | <i>ACTB</i>   | p.R196H |
| CM060092 |             | <i>TWIST1</i> | p.T137P |
| CM085948 | rs121918552 | <i>CYCS</i>   | p.G42S  |
| CM093238 | rs137852648 | <i>GARS</i>   | p.P298L |
| CM066090 | rs376948691 | <i>GHRHR</i>  | p.R357C |
| CM990707 | rs62622373  | <i>GLI3</i>   | p.I808M |
| CM970684 | rs121917716 | <i>GLI3</i>   | p.P707S |
| CM085976 |             | <i>GCK</i>    | p.C457W |
| CM096948 |             | <i>GCK</i>    | p.V406M |
| CM015313 |             | <i>GCK</i>    | p.H380Q |
| CM097123 |             | <i>GCK</i>    | p.H380Q |

|          |             |               |          |
|----------|-------------|---------------|----------|
| CM068317 |             | <i>GCK</i>    | p.E339G  |
| CM970639 |             | <i>GCK</i>    | p.S336L  |
| CM097121 |             | <i>GCK</i>    | p.T326P  |
| CM032918 |             | <i>GCK</i>    | p.G318A  |
| CM073084 |             | <i>GCK</i>    | p.E312Q  |
| CM012128 |             | <i>GCK</i>    | p.S281F  |
| CM077739 |             | <i>GCK</i>    | p.S280N  |
| CM015312 |             | <i>GCK</i>    | p.Q239R  |
| CM096804 |             | <i>GCK</i>    | p.E28K   |
| CM068039 |             | <i>NPC1L1</i> | p.R1268H |
| CM068036 | rs141563640 | <i>NPC1L1</i> | p.R306C  |
| CM068043 | rs116204045 | <i>NPC1L1</i> | p.R174H  |
| CM093709 | rs542063660 | <i>DDC</i>    | p.R412W  |
| CM077528 | rs201951824 | <i>DDC</i>    | p.R347Q  |
| CM022315 | rs143793815 | <i>ASL</i>    | p.T131M  |
| CM042302 |             | <i>ASL</i>    | p.E241K  |
| CM051198 |             | <i>POR</i>    | p.M263V  |
| CM040474 | rs28931608  | <i>POR</i>    | p.R457H  |

|           |             |                |          |
|-----------|-------------|----------------|----------|
| CM057354  | rs121912976 | <i>POR</i>     | p.G539R  |
| CM020669  | rs121918035 | <i>CD36</i>    | p.I413L  |
| CM041830  | rs121918341 | <i>SEMA3E</i>  | p.S703L  |
| CM015107  | rs56187107  | <i>ABCB4</i>   | p.G983S  |
| CM075938  | rs148052192 | <i>ABCB4</i>   | p.T775M  |
| CM071528  |             | <i>ABCB4</i>   | p.I764L  |
| CM075957  |             | <i>ABCB4</i>   | p.E558K  |
| CM122249  | rs142794414 | <i>ABCB4</i>   | p.T34M   |
| CM133186  |             | <i>AKAP9</i>   | p.L705V  |
| CM078295  | rs121908566 | <i>AKAP9</i>   | p.S1570L |
| CM091392  | rs535271603 | <i>PEX1</i>    | p.R948Q  |
| CM1111359 |             | <i>PEX1</i>    | p.V242I  |
| CM070865  | rs72658182  | <i>COL1A2</i>  | p.G766S  |
| CM077633  |             | <i>SGCE</i>    | p.G227V  |
| CM102655  |             | <i>GJC3</i>    | p.R15G   |
| CM113593  | rs146901123 | <i>TFR2</i>    | p.R420H  |
| CM034064  | rs80338876  | <i>TFR2</i>    | p.V22I   |
| CM077339  | rs111033240 | <i>SLC26A4</i> | p.T67S   |

|           |             |                |         |
|-----------|-------------|----------------|---------|
| CM134466  | rs200229408 | <i>SLC26A4</i> | p.V163L |
| CM050320  |             | <i>SLC26A4</i> | p.S166N |
| CM103436  |             | <i>SLC26A4</i> | p.V281I |
| CM078091  |             | <i>SLC26A4</i> | p.G439R |
| CM086956  | rs200779286 | <i>SLC26A4</i> | p.R470H |
| CM077974  |             | <i>SLC26A4</i> | p.F550Y |
| CM1211138 | rs371998143 | <i>SLC26A4</i> | p.I665V |
| CM085696  |             | <i>SLC26A4</i> | p.R714K |
| CM108939  |             | <i>SLC26A4</i> | p.Y728H |
| CM097065  | rs200664061 | <i>SLC26A4</i> | p.E737D |
| CM0910584 |             | <i>SLC26A3</i> | p.I458V |
| CM051459  | rs397514650 | <i>DLD</i>     | p.R482G |
| CM088401  |             | <i>MET</i>     | p.A179T |
| CM033395  |             | <i>MET</i>     | p.P791L |
| CM940237  |             | <i>CFTR</i>    | p.F87L  |
| CM091992  |             | <i>CFTR</i>    | p.F87I  |
| CM043460  |             | <i>CFTR</i>    | p.Q151K |
| CM962457  | rs397508747 | <i>CFTR</i>    | p.I177T |

|          |             |             |         |
|----------|-------------|-------------|---------|
| CM043464 |             | <i>CFTR</i> | p.S321P |
| CM010793 | rs143860237 | <i>CFTR</i> | p.T388M |
| CM941975 | rs397508185 | <i>CFTR</i> | p.N418S |
| CM123029 |             | <i>CFTR</i> | p.R419I |
| CM068683 | rs1801178   | <i>CFTR</i> | p.I507V |
| CM972949 | rs397508228 | <i>CFTR</i> | p.E527Q |
| CM952051 | rs144745159 | <i>CFTR</i> | p.I539T |
| CM920161 | rs121909044 | <i>CFTR</i> | p.R553Q |
| CM990362 | rs1800097   | <i>CFTR</i> | p.V562I |
| CM003248 | rs181878120 | <i>CFTR</i> | p.K683R |
| CM930115 | rs1800101   | <i>CFTR</i> | p.F693L |
| CM015356 | rs145540754 | <i>CFTR</i> | p.F693L |
| CM116799 | rs397508340 | <i>CFTR</i> | p.K696R |
| CM015357 | rs397508352 | <i>CFTR</i> | p.R735K |
| CM000668 | rs150157202 | <i>CFTR</i> | p.V754M |
| CM993863 | rs397508359 | <i>CFTR</i> | p.T760M |
| CM950249 | rs397508373 | <i>CFTR</i> | p.A800G |
| CM044595 |             | <i>CFTR</i> | p.I853F |



|          |             |             |          |
|----------|-------------|-------------|----------|
| CM094117 | rs397508397 | <i>CFTR</i> | p.V855I  |
| CM962471 | rs397508427 | <i>CFTR</i> | p.Y917D  |
| CM993864 |             | <i>CFTR</i> | p.F932S  |
| CM074729 |             | <i>CFTR</i> | p.I980M  |
| CM980354 | rs200553511 | <i>CFTR</i> | p.M1028I |
| CM940270 | rs200321110 | <i>CFTR</i> | p.G1069R |
| CM003255 |             | <i>CFTR</i> | p.A1136T |
| CM011285 |             | <i>CFTR</i> | p.S1161R |
| CM941984 |             | <i>CFTR</i> | p.K1177R |
| CM920181 |             | <i>CFTR</i> | p.K1200E |
| CM920182 | rs75647395  | <i>CFTR</i> | p.I1203V |
| CM931156 | rs397508591 | <i>CFTR</i> | p.V1212I |
| CM980356 | rs76649725  | <i>CFTR</i> | p.S1255L |
| CM983579 | rs397508607 | <i>CFTR</i> | p.F1257L |
| CM043476 |             | <i>CFTR</i> | p.T1263I |
| CM940279 | rs397508621 | <i>CFTR</i> | p.Q1291R |
| CM941988 |             | <i>CFTR</i> | p.E1321Q |
| CM087538 | rs146947665 | <i>CFTR</i> | p.H1375N |

|           |             |                 |          |
|-----------|-------------|-----------------|----------|
| CM972965  | rs373172017 | <i>CFTR</i>     | p.R1422W |
| CM081771  | rs118204055 | <i>RBM28</i>    | p.L351P  |
| CM023023  | rs28939081  | <i>ATP6V0A4</i> | p.R807Q  |
| CM072909  | rs397507480 | <i>BRAF</i>     | p.D565E  |
| CM021670  |             | <i>PRSS1</i>    | p.N29T   |
| HM060042  |             | <i>PRSS1</i>    | p.Q98K   |
| CM134440  |             | <i>CLCN1</i>    | p.V327I  |
| CM004388  | rs80356706  | <i>CLCN1</i>    | p.P932L  |
| CM1110539 |             | <i>EZH2</i>     | p.Y663N  |
| CM058324  | rs199473032 | <i>KCNH2</i>    | p.A1116V |
| CM097605  | rs199473546 | <i>KCNH2</i>    | p.M1115V |
| CM070179  | rs199473024 | <i>KCNH2</i>    | p.S1040G |
| CM097577  | rs199473542 | <i>KCNH2</i>    | p.R1007H |
| CM057119  | rs199473017 | <i>KCNH2</i>    | p.P968L  |
| CM107427  | rs199473011 | <i>KCNH2</i>    | p.R948H  |
| CM097532  | rs199473439 | <i>KCNH2</i>    | p.R922Q  |
| CM097531  | rs199473670 | <i>KCNH2</i>    | p.R920Q  |
| CM097530  | rs199473438 | <i>KCNH2</i>    | p.R920W  |

|           |             |              |          |
|-----------|-------------|--------------|----------|
| CM002315  | rs76420733  | <i>KCNH2</i> | p.P917L  |
| CM055300  | rs199473432 | <i>KCNH2</i> | p.R887H  |
| CM022803  | rs199472912 | <i>KCNH2</i> | p.D501N  |
| CM023396  | rs9770044   | <i>KCNH2</i> | p.E444D  |
| CM095612  | rs199473508 | <i>KCNH2</i> | p.A429P  |
| CM097334  | rs199473504 | <i>KCNH2</i> | p.G314S  |
| CM098142  | rs199472871 | <i>KCNH2</i> | p.P241L  |
| CM055302  | rs199473501 | <i>KCNH2</i> | p.G238S  |
| CM097319  | rs199472865 | <i>KCNH2</i> | p.G149A  |
| CM097318  | rs199472864 | <i>KCNH2</i> | p.P141L  |
| CM097272  | rs199472839 | <i>KCNH2</i> | p.N45Y   |
| CM020451  | rs199472827 | <i>KCNH2</i> | p.S26I   |
| CM040701  | rs386834129 | <i>CLN8</i>  | p.L16M   |
| CM120925  | rs142269885 | <i>CLN8</i>  | p.N125S  |
| CM131345  | rs533807084 | <i>RP1L1</i> | p.F1258S |
| CM1010269 |             | <i>GATA4</i> | p.A66T   |
| CM115165  |             | <i>GATA4</i> | p.S70T   |
| CM076205  | rs115372595 | <i>GATA4</i> | p.A346V  |

|          |             |               |          |
|----------|-------------|---------------|----------|
| CM107551 |             | <i>GATA4</i>  | p.T354A  |
| CM119355 |             | <i>GATA4</i>  | p.P394A  |
| CM003884 |             | <i>ASAH1</i>  | p.H23D   |
| CM900162 | rs118204057 | <i>LPL</i>    | p.G215E  |
| CM115468 |             | <i>HR</i>     | p.G524E  |
| CM123626 | rs200125747 | <i>HR</i>     | p.G325D  |
| CM125697 |             | <i>NRG1</i>   | p.M111T  |
| CM125699 |             | <i>NRG1</i>   | p.M139I  |
| CM063986 |             | <i>FGFR1</i>  | p.A343V  |
| CM003914 |             | <i>ANK1</i>   | p.I1055T |
| CM106018 | rs374512193 | <i>THAP1</i>  | p.M143V  |
| CM065268 |             | <i>HGSNAT</i> | p.W403C  |
| CM090348 |             | <i>HGSNAT</i> | p.V481L  |
| CM051616 | rs201725231 | <i>RP1</i>    | p.A669T  |
| CM056381 | rs200135800 | <i>RP1</i>    | p.D984G  |
| CM085321 | rs200140270 | <i>CHD7</i>   | p.A2789T |
| CM981963 | rs397515522 | <i>TTPA</i>   | p.R59W   |
| CM103434 | rs398123010 | <i>TRPA1</i>  | p.N855S  |

|           |             |               |          |
|-----------|-------------|---------------|----------|
| CM022336  | rs369138501 | <i>CNGB3</i>  | p.K148E  |
| CM066927  | rs61753720  | <i>NBN</i>    | p.D95N   |
| CM100381  |             | <i>TMEM67</i> | p.R172Q  |
| CM102761  |             | <i>TMEM67</i> | p.D301E  |
| CM0910797 | rs121909353 | <i>GDF6</i>   | p.K424R  |
| CM100249  | rs387906794 | <i>GDF6</i>   | p.A199T  |
| CM1211526 | rs201963516 | <i>VPS13B</i> | p.V2481I |
| CM120309  | rs185989928 | <i>KLF10</i>  | p.S225N  |
| CM120308  | rs146181228 | <i>KLF10</i>  | p.T216A  |
| CM120307  | rs370640000 | <i>KLF10</i>  | p.A204T  |
| CM120304  |             | <i>KLF10</i>  | p.A12T   |
| CM116250  | rs387907029 | <i>CTHRC1</i> | p.Q44P   |
| CM099178  | rs144397063 | <i>EXT1</i>   | p.V537I  |
| CM099166  | rs142122090 | <i>EXT1</i>   | p.N373D  |
| CM131797  | rs138852641 | <i>KCNQ3</i>  | p.R780C  |
| CM064317  |             | <i>TG</i>     | p.S990N  |
| CM130238  | rs150133670 | <i>TG</i>     | p.P2202R |
| CM082695  |             | <i>FOXH1</i>  | p.L365M  |

|          |             |                |         |
|----------|-------------|----------------|---------|
| CM082687 |             | <i>FOXH1</i>   | p.S364N |
| CM082710 |             | <i>FOXH1</i>   | p.L282S |
| CM122555 | rs281875188 | <i>SMARCA2</i> | p.P883L |
| CM123195 |             | <i>KCNV2</i>   | p.E80D  |
| CM122528 |             | <i>KCNV2</i>   | p.V378I |
| CM061031 | rs151268759 | <i>GLDC</i>    | p.A569T |
| CM023043 | rs6413464   | <i>CDKN2A</i>  | p.A127S |
| CM994498 | rs146179135 | <i>CDKN2A</i>  | p.D125H |
| CM990359 |             | <i>CDKN2A</i>  | p.R87W  |
| CM980325 | rs372266620 | <i>CDKN2A</i>  | p.A57V  |
| CM994794 |             | <i>CDKN2B</i>  | p.H68Y  |
| CM013716 | rs111033635 | <i>GALT</i>    | p.T23A  |
| CM990635 | rs111033675 | <i>GALT</i>    | p.R123Q |
| CM990650 |             | <i>GALT</i>    | p.I198T |
| CM990651 | rs111033729 | <i>GALT</i>    | p.I198M |
| CM950556 | rs111033784 | <i>GALT</i>    | p.E308K |
| CM074196 | rs111033819 | <i>GALT</i>    | p.I378V |
| CM015017 |             | <i>FANCG</i>   | p.G546R |

|           |             |                |          |
|-----------|-------------|----------------|----------|
| CM1212688 |             | <i>TPM2</i>    | p.R91H   |
| CM128673  | rs370346767 | <i>FANCC</i>   | p.R185Q  |
| CM066194  |             | <i>PTCHI</i>   | p.E1242Q |
| CM081408  |             | <i>PTCHI</i>   | p.S647C  |
| CM032341  |             | <i>PTCHI</i>   | p.G484R  |
| CM066196  | rs370354759 | <i>PTCHI</i>   | p.A412S  |
| CM057562  |             | <i>PTCHI</i>   | p.G110R  |
| CM099570  |             | <i>ABCA1</i>   | p.A1010V |
| CM109183  |             | <i>ABCA1</i>   | p.M636V  |
| CM020395  |             | <i>ABCA1</i>   | p.A255T  |
| CM076367  | rs371701248 | <i>NR5A1</i>   | p.V355M  |
| CM106616  | rs201095702 | <i>NR5A1</i>   | p.G212S  |
| CM130998  | rs148671305 | <i>MAPKAP1</i> | p.S260N  |
| CM051038  | rs148002300 | <i>ENG</i>     | p.S615L  |
| CM111548  |             | <i>ENG</i>     | p.R437Q  |
| CM062600  |             | <i>ENG</i>     | p.R437W  |
| CM050045  |             | <i>ENG</i>     | p.D264N  |
| CM104970  |             | <i>ENG</i>     | p.V238E  |

|           |             |                 |          |
|-----------|-------------|-----------------|----------|
| CM040733  |             | <i>ENG</i>      | p.L8P    |
| CM125607  |             | <i>CIZI</i>     | p.P47S   |
| CM102535  | rs118203745 | <i>TSC1</i>     | p.R1062W |
| CM993762  | rs75820036  | <i>TSC1</i>     | p.Q654E  |
| CM993761  | rs77464996  | <i>TSC1</i>     | p.T417I  |
| CM119188  | rs370960854 | <i>RALGDS</i>   | p.A706V  |
| CM129660  | rs36220239  | <i>ADAMTS13</i> | p.Q456H  |
| CM058044  | rs78977446  | <i>ADAMTS13</i> | p.S903L  |
| CM0910655 |             | <i>INPP5E</i>   | p.T426N  |
| CM083740  | rs111627256 | <i>NOTCH1</i>   | p.V2536I |
| CM083738  | rs79782048  | <i>NOTCH1</i>   | p.E694K  |
| CM126055  |             | <i>OPTN</i>     | p.H3Y    |
| CM045182  |             | <i>OPTN</i>     | p.K435R  |
| CM127849  | rs138083522 | <i>CUBN</i>     | p.S865N  |
| CM070049  | rs121917812 | <i>CACNB2</i>   | p.S481L  |
| CM106907  | rs137973321 | <i>NEBL</i>     | p.G202R  |
| CM107794  |             | <i>ACBD5</i>    | p.H43Y   |
| CM100239  |             | <i>ZEB1</i>     | p.N78S   |



|          |             |              |          |
|----------|-------------|--------------|----------|
| CM080639 | rs567252241 | <i>ZEB1</i>  | p.N696S  |
| CM011807 |             | <i>RET</i>   | p.V202M  |
| CM065436 |             | <i>RET</i>   | p.V282L  |
| CM057465 | rs377767388 | <i>RET</i>   | p.G321R  |
| CM004010 |             | <i>RET</i>   | p.V331M  |
| CM065437 | rs546866208 | <i>RET</i>   | p.A373V  |
| CM001782 |             | <i>RET</i>   | p.D469N  |
| CM962698 | rs138624658 | <i>RET</i>   | p.R475Q  |
| CM011808 | rs537874538 | <i>RET</i>   | p.E480K  |
| CM991097 |             | <i>RET</i>   | p.Q626K  |
| CM023126 | rs77711105  | <i>RET</i>   | p.V648I  |
| CM003953 |             | <i>RET</i>   | p.A654T  |
| CM033979 | rs141185224 | <i>RET</i>   | p.R694Q  |
| CM068590 | rs377767422 | <i>RET</i>   | p.R833C  |
| CM980631 |             | <i>ERCC6</i> | p.P1042L |
| CM119377 |             | <i>CHAT</i>  | p.A235T  |
| CM132491 |             | <i>SIRT1</i> | p.L107P  |
| CM122980 | rs199476411 | <i>MYPN</i>  | p.A882T  |

|          |             |               |         |
|----------|-------------|---------------|---------|
| CM131445 |             | <i>DNA2</i>   | p.R198H |
| CM094516 | rs10999334  | <i>NODAL</i>  | p.E203K |
| CM971053 | rs104894169 | <i>NODAL</i>  | p.R183Q |
| CM080504 |             | <i>PRF1</i>   | p.Q446R |
| CM080510 |             | <i>PRF1</i>   | p.R356W |
| CM087862 | rs145463632 | <i>PRF1</i>   | p.G334S |
| CM040246 | rs200430442 | <i>PRF1</i>   | p.R54C  |
| CM121409 |             | <i>PRF1</i>   | p.D49N  |
| CM114796 |             | <i>PRF1</i>   | p.R28H  |
| CM116251 | rs146370051 | <i>ASCCI</i>  | p.N290S |
| CM960954 |             | <i>MATIA</i>  | p.R199C |
| CM993201 | rs377043137 | <i>RGR</i>    | p.A234T |
| CM022240 | rs202004587 | <i>PTEN</i>   | p.A79T  |
| CM109590 |             | <i>PTEN</i>   | p.G165R |
| CM110122 |             | <i>PTEN</i>   | p.G165R |
| CM065175 | rs56006128  | <i>FAS</i>    | p.E194K |
| CM094354 | rs144770680 | <i>ANKRD1</i> | p.I280V |
| CM094353 | rs145387010 | <i>ANKRD1</i> | p.T123M |

|           |             |                |         |
|-----------|-------------|----------------|---------|
| CM094350  | rs114435632 | <i>ANKRD1</i>  | p.V107L |
| CM094349  | rs148189486 | <i>ANKRD1</i>  | p.P105S |
| CM098790  | rs267606934 | <i>PDE6C</i>   | p.H602L |
| CM078277  |             | <i>FGF8</i>    | p.D73H  |
| CM097202  | rs61754263  | <i>CYP17A1</i> | p.R21K  |
| CM984203  | rs138824013 | <i>COL17A1</i> | p.V991M |
| CM1111347 |             | <i>BAG3</i>    | p.P115S |
| CM111938  |             | <i>BAG3</i>    | p.A262T |
| CM106629  | rs318240760 | <i>WDR11</i>   | p.A435T |
| CM106630  | rs144440500 | <i>WDR11</i>   | p.R448Q |
| CM052827  | rs201035053 | <i>ACADSB</i>  | p.Y283C |
| CM061797  | rs104894229 | <i>HRAS</i>    | p.G12C  |
| CM870013  | rs121918101 | <i>INS</i>     | p.H34D  |
| CM107602  | rs13306444  | <i>INS</i>     | p.A23S  |
| CM101404  | rs121908259 | <i>INS</i>     | p.R6H   |
| CM057176  | rs199473671 | <i>KCNQ1</i>   | p.A46T  |
| CM034233  | rs199472694 | <i>KCNQ1</i>   | p.V172M |
| CM097147  | rs150172393 | <i>KCNQ1</i>   | p.R195W |

|           |             |               |          |
|-----------|-------------|---------------|----------|
| CM097219  | rs199472780 | <i>KCNQ1</i>  | p.D446E  |
| CM043853  | rs199472781 | <i>KCNQ1</i>  | p.R451Q  |
| CM070182  | rs199472783 | <i>KCNQ1</i>  | p.G460S  |
| CM133146  |             | <i>KCNQ1</i>  | p.V576I  |
| CM055332  | rs199472819 | <i>KCNQ1</i>  | p.L619M  |
| CM024480  | rs33993568  | <i>HBB</i>    | p.T88K   |
| CM087634  | rs63750840  | <i>HBB</i>    | p.N20K   |
| CM023082  | rs34536353  | <i>HBD</i>    | p.R117H  |
| CM066879  | rs63750674  | <i>HBD</i>    | p.Q88K   |
| CM121726  | rs142215226 | <i>SMPD1</i>  | p.V114M  |
| CM042116  |             | <i>SMPD1</i>  | p.W246C  |
| CM119180  |             | <i>SMPD1</i>  | p.F572L  |
| CM014527  |             | <i>TPP1</i>   | p.E423D  |
| CM050197  |             | <i>TPP1</i>   | p.R266Q  |
| CM940054  | rs147542803 | <i>AMPD3</i>  | p.A320V  |
| CM051091  |             | <i>KCNJ11</i> | p.A101D  |
| CM107097  |             | <i>ABCC8</i>  | p.R1436G |
| CM1212138 | rs368114790 | <i>ABCC8</i>  | p.R521Q  |

|           |             |               |          |
|-----------|-------------|---------------|----------|
| CM984620  | rs185040406 | <i>ABCC8</i>  | p.R275Q  |
| CM1212695 | rs61910685  | <i>ANO5</i>   | p.S796L  |
| CM031323  | rs121907926 | <i>PAX6</i>   | p.T391A  |
| CM081729  |             | <i>PAX6</i>   | p.G36E   |
| CM065423  |             | <i>RAG1</i>   | p.K136Q  |
| CM010089  |             | <i>RAG2</i>   | p.N474S  |
| CM014568  |             | <i>EXT2</i>   | p.I380T  |
| CM087406  |             | <i>F2</i>     | p.R5Q    |
| CM830036  | rs62623459  | <i>F2</i>     | p.E200K  |
| CM102953  |             | <i>LRP4</i>   | p.L473F  |
| CM081703  | rs202147520 | <i>MYBPC3</i> | p.G1248R |
| CM073210  | rs371061770 | <i>MYBPC3</i> | p.T1046M |
| CM116877  | rs368180702 | <i>MYBPC3</i> | p.E1017K |
| CM088318  | rs367729718 | <i>MYBPC3</i> | p.Q921E  |
| CM086869  |             | <i>MYBPC3</i> | p.A693S  |
| CM115897  | rs397515939 | <i>MYBPC3</i> | p.R654C  |
| CM068012  |             | <i>MYBPC3</i> | p.M555T  |
| CM115894  |             | <i>MYBPC3</i> | p.V437M  |

|          |             |                 |         |
|----------|-------------|-----------------|---------|
| CM031257 | rs375774648 | <i>MYBPC3</i>   | p.G279A |
| CM132306 | rs201012766 | <i>MYBPC3</i>   | p.R177H |
| CM020154 | rs121909375 | <i>MYBPC3</i>   | p.T59A  |
| CM115883 |             | <i>MYBPC3</i>   | p.K7R   |
| CM973237 |             | <i>SERPING1</i> | p.H155R |
| CM087069 |             | <i>SERPING1</i> | p.A156D |
| CM004571 |             | <i>SERPING1</i> | p.I274V |
| CM096506 |             | <i>SERPING1</i> | p.R286C |
| CM973241 |             | <i>SERPING1</i> | p.T301I |
| CM973242 |             | <i>SERPING1</i> | p.T301K |
| CM117772 |             | <i>SERPING1</i> | p.S377P |
| CM973246 |             | <i>SERPING1</i> | p.A461V |
| CM127878 |             | <i>GIF</i>      | p.A229T |
| CM991235 | rs281865209 | <i>BEST1</i>    | p.R13H  |
| CM100161 |             | <i>BEST1</i>    | p.L75F  |
| HM030039 |             | <i>BEST1</i>    | p.F113L |
| CM111663 |             | <i>BEST1</i>    | p.N133H |
| CM993516 | rs281865275 | <i>BEST1</i>    | p.T216I |

|           |             |                 |         |
|-----------|-------------|-----------------|---------|
| CM004442  | rs281865268 | <i>BEST1</i>    | p.T307A |
| CM991244  | rs281865269 | <i>BEST1</i>    | p.T307I |
| CM111706  | rs111326315 | <i>BEST1</i>    | p.V492I |
| CM951138  |             | <i>ROM1</i>     | p.R242Q |
| CM088171  |             | <i>SLC22A12</i> | p.R124L |
| CM043576  | rs201181059 | <i>SLC22A12</i> | p.G164S |
| CM1110339 | rs145200251 | <i>SLC22A12</i> | p.R434C |
| CM993969  |             | <i>PYGM</i>     | p.L116P |
| CM056977  |             | <i>MEN1</i>     | p.G28A  |
| CM132040  | rs397514733 | <i>CTSF</i>     | p.S480L |
| CM116099  |             | <i>AIP</i>      | p.R56C  |
| CM122860  |             | <i>AIP</i>      | p.R188Q |
| CM122858  |             | <i>AIP</i>      | p.R325Q |
| CM041400  | rs111033588 | <i>NDUFS8</i>   | p.R138H |
| CM000689  |             | <i>DHCR7</i>    | p.V353A |
| CM052846  |             | <i>DHCR7</i>    | p.S113C |
| CM130290  |             | <i>INPPL1</i>   | p.Q251H |
| CM113809  | rs373468564 | <i>UCP3</i>     | p.V192I |

|          |             |               |         |
|----------|-------------|---------------|---------|
| CM113808 | rs74907838  | <i>UCP3</i>   | p.A111V |
| CM113807 | rs145163696 | <i>UCP3</i>   | p.V56M  |
| CM011795 | rs17215437  | <i>KCNE3</i>  | p.R83H  |
| CM092104 | rs200856070 | <i>KCNE3</i>  | p.T4A   |
| CM971016 |             | <i>MYO7A</i>  | p.G955S |
| CM981973 | rs61753177  | <i>TYR</i>    | p.H19Q  |
| CM091275 |             | <i>TYR</i>    | p.D76E  |
| CM090086 | rs13312740  | <i>TYR</i>    | p.Q90R  |
| CM041464 |             | <i>TYR</i>    | p.T155S |
| CM930714 | rs61754365  | <i>TYR</i>    | p.R217Q |
| CM971548 | rs61754379  | <i>TYR</i>    | p.T325A |
| CM900222 | rs61754388  | <i>TYR</i>    | p.T373K |
| CM041482 |             | <i>TYR</i>    | p.E409D |
| CM041486 |             | <i>TYR</i>    | p.S424F |
| CM121589 |             | <i>MTNR1B</i> | p.W22L  |
| CM121590 | rs369464202 | <i>MTNR1B</i> | p.A52T  |
| CM121595 | rs574453327 | <i>MTNR1B</i> | p.R222H |
| CM121596 | rs552946015 | <i>MTNR1B</i> | p.R330W |



|           |             |                |          |
|-----------|-------------|----------------|----------|
| CM056648  |             | <i>MMP20</i>   | p.H226Q  |
| CM133156  |             | <i>DYNC2HI</i> | p.I2640T |
| CM910005  | rs120074140 | <i>ACAT1</i>   | p.A380T  |
| CM990203  |             | <i>ATM</i>     | p.F570S  |
| CM023329  | rs2235006   | <i>ATM</i>     | p.F582L  |
| CM980136  |             | <i>ATM</i>     | p.N768D  |
| CM0910491 |             | <i>ATM</i>     | p.M779T  |
| CM990204  |             | <i>ATM</i>     | p.R785C  |
| CM035780  |             | <i>ATM</i>     | p.M838V  |
| CM095585  |             | <i>ATM</i>     | p.L1046F |
| CM023332  | rs2229020   | <i>ATM</i>     | p.Q1128R |
| CM035634  | rs147600485 | <i>ATM</i>     | p.N1356D |
| CM062567  | rs387907337 | <i>CRYAB</i>   | p.P20S   |
| CM092199  |             | <i>SDHD</i>    | p.A123T  |
| CM109167  |             | <i>SDHD</i>    | p.V147M  |
| CM101211  |             | <i>PTS</i>     | p.I18T   |
| CM121713  |             | <i>PTS</i>     | p.S23T   |
| CM981678  |             | <i>PTS</i>     | p.R25G   |

|           |             |                |         |
|-----------|-------------|----------------|---------|
| CM941200  | rs104894273 | <i>PTS</i>     | p.R25Q  |
| CM971281  | rs104894277 | <i>PTS</i>     | p.V56M  |
| CM101210  |             | <i>PTS</i>     | p.V103A |
| CM064187  |             | <i>PTS</i>     | p.Y113C |
| CM011476  | rs150726932 | <i>PTS</i>     | p.V124L |
| CM087320  |             | <i>PTS</i>     | p.L127F |
| CM960072  | rs2238008   | <i>APOA4</i>   | p.R264Q |
| CM073331  | rs121434386 | <i>SCN4B</i>   | p.L179F |
| CM096299  | rs72544145  | <i>SCN2B</i>   | p.R28Q  |
| CM993452  |             | <i>HMBS</i>    | p.V202L |
| CM0911047 |             | <i>HMBS</i>    | p.D230Y |
| CM040225  |             | <i>HMBS</i>    | p.G236S |
| CM970738  |             | <i>HMBS</i>    | p.A270D |
| CM104099  |             | <i>SIAE</i>    | p.Y349C |
| CM116463  | rs387906995 | <i>CDON</i>    | p.P689A |
| CM095059  | rs138120505 | <i>KCNJ1</i>   | p.R188C |
| CM1110589 |             | <i>KCNJ5</i>   | p.G151E |
| CM133491  |             | <i>CACNA1C</i> | p.N547S |

|           |             |                |          |
|-----------|-------------|----------------|----------|
| CM133493  |             | <i>CACNA1C</i> | p.R1780H |
| CM1212180 |             | <i>KCNA5</i>   | p.E48G   |
| CM070953  |             | <i>KCNA5</i>   | p.P91L   |
| CM093240  | rs121908592 | <i>KCNA5</i>   | p.A576V  |
| CM070338  | rs62641244  | <i>VWF</i>     | p.P2722A |
| CM070320  | rs62641242  | <i>VWF</i>     | p.R2313H |
| CM070306  | rs61750618  | <i>VWF</i>     | p.P2145S |
| CM961449  | rs61750598  | <i>VWF</i>     | p.G1672R |
| CM971583  | rs267607344 | <i>VWF</i>     | p.S1543F |
| CM130611  |             | <i>VWF</i>     | p.R1527Q |
| CM130612  |             | <i>VWF</i>     | p.I1509V |
| CM930731  | rs61750100  | <i>VWF</i>     | p.S1506L |
| CM130613  |             | <i>VWF</i>     | p.M1495L |
| CM095107  | rs61750091  | <i>VWF</i>     | p.P1467S |
| CM930730  | rs61750089  | <i>VWF</i>     | p.A1461V |
| CM074637  | rs61750085  | <i>VWF</i>     | p.E1447Q |
| CM070351  | rs61750073  | <i>VWF</i>     | p.S1378F |
| CM971576  | rs61749388  | <i>VWF</i>     | p.R1308H |

|          |             |                 |          |
|----------|-------------|-----------------|----------|
| CM095102 | rs61749382  | <i>VWF</i>      | p.D1302G |
| CM000038 | rs121964895 | <i>VWF</i>      | p.R1205H |
| CM103477 |             | <i>VWF</i>      | p.C1126F |
| CM095091 | rs61748479  | <i>VWF</i>      | p.M800V  |
| CM951302 | rs61748472  | <i>VWF</i>      | p.R782Q  |
| CM083206 |             | <i>VWF</i>      | p.R768Q  |
| CM045319 | rs104895257 | <i>TNFRSF1A</i> | p.R133Q  |
| CM012483 | rs4149584   | <i>TNFRSF1A</i> | p.R121Q  |
| CM113401 | rs104895290 | <i>TNFRSF1A</i> | p.H95Y   |
| CM045318 | rs34751757  | <i>TNFRSF1A</i> | p.T90I   |
| CM012481 | rs4149637   | <i>TNFRSF1A</i> | p.P75L   |
| CM104767 |             | <i>TNFRSF1A</i> | p.N54D   |
| CM066247 | rs104895271 | <i>TNFRSF1A</i> | p.D41E   |
| CM100247 | rs146973734 | <i>GDF3</i>     | p.R195Q  |
| CM123462 |             | <i>GUCY2C</i>   | p.D387G  |
| CM960852 | rs1800203   | <i>IAPP</i>     | p.S53G   |
| CM994354 | rs267607212 | <i>LDHB</i>     | p.W325R  |
| CM900151 | rs118203895 | <i>LDHB</i>     | p.R172H  |

|           |             |                 |          |
|-----------|-------------|-----------------|----------|
| CM960927  |             | <i>LDHB</i>     | p.R107W  |
| CM014204  |             | <i>LDHB</i>     | p.G69E   |
| CM113820  | rs146882581 | <i>PKP2</i>     | p.T526M  |
| CM077751  |             | <i>PKP2</i>     | p.G328R  |
| CM105193  | rs139139859 | <i>PKP2</i>     | p.S169G  |
| CM115348  |             | <i>PKP2</i>     | p.N76S   |
| CM056641  | rs281865045 | <i>LRRK2</i>    | p.Q930R  |
| CM043517  | rs34805604  | <i>LRRK2</i>    | p.I1122V |
| CM081687  | rs111691891 | <i>LRRK2</i>    | p.T2141M |
| CM119663  |             | <i>PRICKLE1</i> | p.R682C  |
| CM085754  | rs137853050 | <i>TUBA1A</i>   | p.R422H  |
| CM074616  | rs137853044 | <i>TUBA1A</i>   | p.R402H  |
| CM085756  | rs137853048 | <i>TUBA1A</i>   | p.L397P  |
| CM1010006 |             | <i>TUBA1A</i>   | p.R390C  |
| CM970097  | rs104894336 | <i>AQP2</i>     | p.L22V   |
| CM950082  | rs104894341 | <i>AQP2</i>     | p.A190T  |
| CM024087  |             | <i>AQP2</i>     | p.V194I  |
| CM062393  | rs149664056 | <i>ACVRL1</i>   | p.P30S   |

|          |             |                |          |
|----------|-------------|----------------|----------|
| CM060787 | rs139380315 | <i>ACVRL1</i>  | p.H297R  |
| CM130344 |             | <i>ACVRL1</i>  | p.I317T  |
| CM104982 |             | <i>ACVRL1</i>  | p.N335H  |
| CM066898 | rs57282588  | <i>KRT8</i>    | p.G55A   |
| CM016199 | rs137853104 | <i>AMHR2</i>   | p.R406Q  |
| CM984679 |             | <i>CYP27B1</i> | p.Q65H   |
| CM133784 |             | <i>SRGAP1</i>  | p.Q149H  |
| CM112028 | rs201867922 | <i>GRIP1</i>   | p.I497V  |
| CM101928 | rs139658279 | <i>BBS10</i>   | p.M255I  |
| CM063876 |             | <i>BBS10</i>   | p.L170S  |
| CM114281 | rs374852145 | <i>CEP290</i>  | p.R2210C |
| CM068148 | rs138526583 | <i>APAF1</i>   | p.E777K  |
| CM920564 | rs62644499  | <i>PAH</i>     | p.D415N  |
| CM002086 | rs62642911  | <i>PAH</i>     | p.T378S  |
| CM950895 | rs62507268  | <i>PAH</i>     | p.K371R  |
| CM068054 | rs63329263  | <i>PAH</i>     | p.K363N  |
| CM962547 | rs62507320  | <i>PAH</i>     | p.Y356H  |
| CM010980 | rs62516153  | <i>PAH</i>     | p.K341R  |

|          |             |            |         |
|----------|-------------|------------|---------|
| CM971130 | rs62507319  | <i>PAH</i> | p.D222G |
| CM992372 | rs74486803  | <i>PAH</i> | p.R176Q |
| CM011945 | rs77554925  | <i>PAH</i> | p.N167S |
| CM941128 | rs199475595 | <i>PAH</i> | p.I164T |
| CM992944 | rs148393887 | <i>PAH</i> | p.H100R |
| CM992650 | rs62508695  | <i>PAH</i> | p.R71H  |
| CM981427 | rs118092776 | <i>PAH</i> | p.R53H  |
| CM010948 | rs199475619 | <i>PAH</i> | p.R53C  |
| CM910280 | rs62642926  | <i>PAH</i> | p.F39L  |
| CM000542 | rs199475662 | <i>PAH</i> | p.Q20L  |
| CM112733 |             | <i>PAH</i> | p.S16Y  |
| CM050697 | rs104895336 | <i>MVK</i> | p.V132I |
| CM115594 |             | <i>MVK</i> | p.G212R |
| CM097631 |             | <i>MVK</i> | p.P228L |
| CM050700 | rs104895339 | <i>MVK</i> | p.V250I |
| CM055448 | rs104895352 | <i>MVK</i> | p.R277H |
| CM068194 | rs104895355 | <i>MVK</i> | p.P288L |
| CM068196 | rs104895356 | <i>MVK</i> | p.V293M |

|          |             |                 |         |
|----------|-------------|-----------------|---------|
| CM990889 | rs104895319 | <i>MVK</i>      | p.V310M |
| CM990890 | rs28934897  | <i>MVK</i>      | p.V377I |
| CM990251 |             | <i>ATP2A2</i>   | p.G749R |
| CM961006 | rs121913658 | <i>MYL2</i>     | p.P95A  |
| CM961005 | rs104894368 | <i>MYL2</i>     | p.E22K  |
| CM064303 |             | <i>HNF1A</i>    | p.T10M  |
| CM082857 |             | <i>HNF1A</i>    | p.A14V  |
| CM133546 | rs373180062 | <i>HNF1A</i>    | p.G47R  |
| CM067041 | rs568123980 | <i>HNF1A</i>    | p.T82M  |
| CM981896 |             | <i>HNF1A</i>    | p.R159W |
| CM100898 | rs151256267 | <i>HNF1A</i>    | p.P291S |
| CM082833 |             | <i>HNF1A</i>    | p.P467L |
| CM082841 | rs483353044 | <i>HNF1A</i>    | p.E508K |
| CM023591 |             | <i>HNF1A</i>    | p.V567I |
| CM020517 | rs137853242 | <i>HNF1A</i>    | p.R583Q |
| CM128624 |             | <i>HNF1A</i>    | p.G606S |
| CM123333 | rs187433682 | <i>TCTN2</i>    | p.G373R |
| CM093108 | rs372988817 | <i>ATP6V0A2</i> | p.P87L  |



|           |             |              |          |
|-----------|-------------|--------------|----------|
| CM012137  |             | <i>GJB2</i>  | p.A197S  |
| CM094300  | rs397516876 | <i>GJB2</i>  | p.S138G  |
| CM073092  |             | <i>GJB2</i>  | p.K105R  |
| CM993707  |             | <i>GJB2</i>  | p.R98Q   |
| CM125596  | rs200674715 | <i>GJB6</i>  | p.M203V  |
| CM1110302 |             | <i>GJB6</i>  | p.E101K  |
| CM131361  |             | <i>SACS</i>  | p.V3345A |
| CM107950  | rs144938364 | <i>CENPJ</i> | p.T821M  |
| CM1111060 | rs80358674  | <i>BRCA2</i> | p.Q147R  |
| CM065022  | rs397507722 | <i>BRCA2</i> | p.H150R  |
| CM980237  | rs397507843 | <i>BRCA2</i> | p.V211A  |
| CM065038  | rs80358956  | <i>BRCA2</i> | p.D244N  |
| CM1111061 |             | <i>BRCA2</i> | p.M408T  |
| CM057493  | rs55816687  | <i>BRCA2</i> | p.Q713L  |
| CM1111066 | rs80358589  | <i>BRCA2</i> | p.M1149V |
| CM003132  | rs397507674 | <i>BRCA2</i> | p.S1179N |
| CM057867  |             | <i>BRCA2</i> | p.E1895Q |
| CM1111064 |             | <i>BRCA2</i> | p.M1936V |

|          |             |              |          |
|----------|-------------|--------------|----------|
| CM010171 | rs80358876  | <i>BRCA2</i> | p.N2135H |
| CM010172 | rs397507875 | <i>BRCA2</i> | p.Y2222C |
| CM023888 |             | <i>BRCA2</i> | p.H2415R |
| CM012590 | rs55716624  | <i>BRCA2</i> | p.R2502C |
| CM035692 | rs397508016 | <i>BRCA2</i> | p.M2952V |
| CM032863 | rs80359164  | <i>BRCA2</i> | p.Q3034R |
| CM057985 | rs200844292 | <i>RBI</i>   | p.G310E  |
| CM025386 |             | <i>RBI</i>   | p.K319R  |
| CM110345 | rs148399850 | <i>ATP7B</i> | p.V1297I |
| CM980185 |             | <i>ATP7B</i> | p.Q1142H |
| CM095180 |             | <i>ATP7B</i> | p.G1111A |
| CM970144 | rs59959366  | <i>ATP7B</i> | p.R1038K |
| CM087673 |             | <i>ATP7B</i> | p.V1036I |
| CM125007 |             | <i>ATP7B</i> | p.K1020R |
| CM053120 |             | <i>ATP7B</i> | p.A861T  |
| CM111988 |             | <i>ATP7B</i> | p.T850I  |
| CM118180 | rs539585071 | <i>ATP7B</i> | p.R827W  |
| CM068335 |             | <i>ATP7B</i> | p.K755R  |

|          |             |                |         |
|----------|-------------|----------------|---------|
| CM061646 | rs187046823 | <i>ATP7B</i>   | p.E541K |
| CM081181 | rs138427376 | <i>ATP7B</i>   | p.V536A |
| CM994106 |             | <i>ATP7B</i>   | p.L436V |
| CM118177 |             | <i>ATP7B</i>   | p.P410L |
| CM077235 |             | <i>ATP7B</i>   | p.D196E |
| CM120885 | rs200353554 | <i>CLN5</i>    | p.P21S  |
| CM120886 | rs199727787 | <i>CLN5</i>    | p.W75R  |
| CM100208 |             | <i>EDNRB</i>   | p.K56T  |
| CM066602 |             | <i>SLITRK1</i> | p.R584K |
| CM001142 | rs368272420 | <i>F7</i>      | p.V44I  |
| CM090299 |             | <i>F7</i>      | p.V54I  |
| CM001138 |             | <i>F7</i>      | p.F64L  |
| CM900084 | rs150525536 | <i>F7</i>      | p.R139Q |
| CM074159 |             | <i>F7</i>      | p.S163G |
| CM004521 |             | <i>F7</i>      | p.R170C |
| CM090323 | rs143855920 | <i>F7</i>      | p.S171F |
| CM090325 |             | <i>F7</i>      | p.D183N |
| CM081606 | rs372005651 | <i>F7</i>      | p.G184R |

|           |             |            |         |
|-----------|-------------|------------|---------|
| CM090304  |             | <i>F7</i>  | p.D272N |
| CM960528  | rs121964931 | <i>F7</i>  | p.A304V |
| CM001151  | rs147680958 | <i>F7</i>  | p.R307C |
| CM940391  | rs121964929 | <i>F7</i>  | p.R307H |
| CM960529  |             | <i>F7</i>  | p.E325K |
| CM090308  | rs146698837 | <i>F7</i>  | p.R326Q |
| CM074780  |             | <i>F7</i>  | p.G343S |
| CM090309  |             | <i>F7</i>  | p.R350C |
| CM910116  | rs121964926 | <i>F7</i>  | p.R364Q |
| CM960534  | rs121964930 | <i>F7</i>  | p.T419M |
| CM090322  | rs3093248   | <i>F7</i>  | p.E445K |
| CM103623  |             | <i>F10</i> | p.V8F   |
| CM021094  |             | <i>F10</i> | p.D135E |
| CM025193  | rs369409423 | <i>F10</i> | p.D408N |
| CM060829  | rs121909538 | <i>ANG</i> | p.R55K  |
| CM060832  | rs121909541 | <i>ANG</i> | p.I70V  |
| CM085236  |             | <i>ANG</i> | p.N73S  |
| CM1110461 |             | <i>ANG</i> | p.K78R  |

|          |             |                |          |
|----------|-------------|----------------|----------|
| CM121093 | rs553513710 | <i>ANG</i>     | p.V127I  |
| CM057744 | rs142796310 | <i>RPGRIP1</i> | p.T806I  |
| CM076487 | rs190490019 | <i>RPGRIP1</i> | p.R812Q  |
| CM057751 | rs181758389 | <i>RPGRIP1</i> | p.R852Q  |
| CM057753 | rs200657688 | <i>RPGRIP1</i> | p.P882S  |
| CM057763 | rs386833816 | <i>SLC7A7</i>  | p.F152L  |
| CM080553 | rs386833792 | <i>SLC7A7</i>  | p.T5I    |
| CM061882 | rs104894466 | <i>PABPN1</i>  | p.G12A   |
| CM115875 | rs370328209 | <i>MYH7</i>    | p.R1662H |
| CM106108 | rs141122361 | <i>MYH7</i>    | p.A1637T |
| CM081705 | rs145677314 | <i>MYH7</i>    | p.R787C  |
| CM071870 | rs121913653 | <i>MYH7</i>    | p.T441M  |
| CM034050 |             | <i>MYH7</i>    | p.S148I  |
| CM921019 |             | <i>MYH7</i>    | p.V59I   |
| CM011944 |             | <i>NRL</i>     | p.G122E  |
| CM085744 | rs199422321 | <i>TINF2</i>   | p.P236S  |
| CM971483 | rs147516124 | <i>TGM1</i>    | p.R687C  |
| CM129980 |             | <i>TGM1</i>    | p.R37G   |

|           |             |               |          |
|-----------|-------------|---------------|----------|
| CM032215  | rs121908931 | <i>COCH</i>   | p.A119T  |
| CM057567  | rs200560568 | <i>NKX2-1</i> | p.G352S  |
| CM115493  | rs138568622 | <i>SEC23A</i> | p.M702V  |
| CM1210376 | rs387907308 | <i>NIN</i>    | p.N1709S |
| CM1210375 | rs187464517 | <i>NIN</i>    | p.Q1222R |
| CM091521  | rs121912768 | <i>BMP4</i>   | p.R287H  |
| CM091517  |             | <i>BMP4</i>   | p.R162Q  |
| CM091516  | rs202159001 | <i>BMP4</i>   | p.T102A  |
| CM960729  | rs41298442  | <i>GCHI</i>   | p.K224R  |
| CM011356  |             | <i>GCHI</i>   | p.V191I  |
| CM093869  |             | <i>GCHI</i>   | p.H153R  |
| CM011337  | rs41298432  | <i>GCHI</i>   | p.P23L   |
| CM128767  |             | <i>DACT1</i>  | p.V702G  |
| CM983746  | rs34181110  | <i>MTHFD1</i> | p.R293H  |
| CM054833  |             | <i>RDH12</i>  | p.R234H  |
| CM951085  | rs63751416  | <i>PSEN1</i>  | p.L392V  |
| CM054041  | rs104894458 | <i>NPC2</i>   | p.P120S  |
| CM032651  | rs151220873 | <i>NPC2</i>   | p.V30M   |

|          |             |                 |          |
|----------|-------------|-----------------|----------|
| CM126923 | rs137854856 | <i>LTBP2</i>    | p.V1177M |
| CM052934 |             | <i>TSHR</i>     | p.P27T   |
| CM041764 | rs121434302 | <i>FBLN5</i>    | p.A363T  |
| CM041761 | rs121434301 | <i>FBLN5</i>    | p.P87S   |
| CM830003 | rs28929474  | <i>SERPINA1</i> | p.E366K  |
| CM900186 | rs143370956 | <i>SERPINA1</i> | p.D365N  |
| CM083102 | rs200945035 | <i>SERPINA1</i> | p.K359E  |
| CM109803 | rs373630097 | <i>SERPINA1</i> | p.V357M  |
| CM012639 | rs199422208 | <i>SERPINA1</i> | p.E228K  |
| CM900184 | rs112030253 | <i>SERPINA1</i> | p.G172R  |
| CM900183 | rs11558261  | <i>SERPINA1</i> | p.G139S  |
| CM124333 | rs387906743 | <i>DYNC1H1</i>  | p.Y970C  |
| CM126390 | rs371775791 | <i>NIPA2</i>    | p.N244S  |
| HM090075 |             | <i>OCA2</i>     | p.G824R  |
| CM051592 |             | <i>OCA2</i>     | p.I646V  |
| CM971081 | rs140566426 | <i>OCA2</i>     | p.M446V  |
| CM031307 | rs183487020 | <i>OCA2</i>     | p.P198L  |
| CM074577 | rs373384814 | <i>SPRED1</i>   | p.S149N  |

|          |             |               |          |
|----------|-------------|---------------|----------|
| CM042947 | rs28989183  | <i>BUB1B</i>  | p.Q921H  |
| CM053157 | rs148538711 | <i>CAPN3</i>  | p.P103L  |
| CM061671 |             | <i>CAPN3</i>  | p.V320F  |
| CM124988 | rs76116949  | <i>SPG11</i>  | p.K2419R |
| CM116343 | rs138353181 | <i>DUOX2</i>  | p.A728T  |
| CM066051 | rs200134167 | <i>DUOX2</i>  | p.D506N  |
| CM098733 |             | <i>FBNI</i>   | p.G2669V |
| CM108654 |             | <i>FBNI</i>   | p.D2607N |
| CM096453 |             | <i>FBNI</i>   | p.R1632H |
| CM130607 |             | <i>FBNI</i>   | p.M1384L |
| CM108650 |             | <i>FBNI</i>   | p.D1322H |
| CM117997 |             | <i>FBNI</i>   | p.N1168S |
| CM013926 |             | <i>FBNI</i>   | p.V1128I |
| CM108850 | rs200879436 | <i>CEP152</i> | p.K667R  |
| CM910257 | rs121912502 | <i>LIPC</i>   | p.S289F  |
| CM994508 |             | <i>LIPC</i>   | p.E365Q  |
| CM120904 | rs374681194 | <i>CLN6</i>   | p.R252H  |
| CM126855 | rs202173526 | <i>HEXA</i>   | p.F434L  |



|           |             |                |          |
|-----------|-------------|----------------|----------|
| CM950623  |             | <i>HEXA</i>    | p.N196S  |
| CM021492  |             | <i>BBS4</i>    | p.N165H  |
| CM021495  |             | <i>BBS4</i>    | p.S457I  |
| CM033338  |             | <i>BBS4</i>    | p.P503L  |
| CM078703  | rs56204206  | <i>SEMA7A</i>  | p.R460H  |
| CM078702  | rs55637216  | <i>SEMA7A</i>  | p.R207Q  |
| CM993718  | rs369326210 | <i>MPI</i>     | p.I398T  |
| CM068201  | rs104895418 | <i>PSTPIP1</i> | p.D266N  |
| CM111440  | rs150233690 | <i>POLG</i>    | p.V1044A |
| CM114722  | rs138457939 | <i>POLG</i>    | p.N736S  |
| CM071924  | rs121918055 | <i>POLG</i>    | p.S511N  |
| CM042458  | rs145843073 | <i>POLG</i>    | p.N468D  |
| CM032206  |             | <i>CACNAIH</i> | p.P648L  |
| CM032207  | rs373764821 | <i>CACNAIH</i> | p.R744Q  |
| CM032210  |             | <i>CACNAIH</i> | p.G784S  |
| CM051891  |             | <i>CLCN7</i>   | p.R674Q  |
| CM0910847 |             | <i>CLCN7</i>   | p.R561Q  |
| CM067061  | rs45505895  | <i>TSC2</i>    | p.A1141T |

|           |             |             |          |
|-----------|-------------|-------------|----------|
| CM983889  | rs45517294  | <i>TSC2</i> | p.V1144M |
| CM122780  | rs397515209 | <i>TSC2</i> | p.T1330M |
| CM114767  | rs137854343 | <i>TSC2</i> | p.G1642D |
| CM961389  | rs45517393  | <i>TSC2</i> | p.P1709L |
| CM094926  |             | <i>PKDI</i> | p.Q4216H |
| CM961116  |             | <i>PKDI</i> | p.E3632D |
| CM981543  | rs371283948 | <i>PKDI</i> | p.V3375M |
| CM034120  |             | <i>PKDI</i> | p.P3355L |
| CM092155  |             | <i>PKDI</i> | p.R3105W |
| CM971181  |             | <i>PKDI</i> | p.L2763V |
| CM012643  |             | <i>PKDI</i> | p.T2649I |
| CM108790  | rs200037070 | <i>PKDI</i> | p.H2546Y |
| CM068424  | rs556618384 | <i>PKDI</i> | p.R2477H |
| CM1111441 | rs530832015 | <i>PKDI</i> | p.P2293L |
| CM074415  | rs148763212 | <i>PKDI</i> | p.T1861I |
| CM022654  | rs143690392 | <i>PKDI</i> | p.R1340W |
| CM1210913 |             | <i>PKDI</i> | p.V1206G |
| CM003329  | rs573566419 | <i>PKDI</i> | p.G1166S |

|          |             |              |          |
|----------|-------------|--------------|----------|
| CM034111 |             | <i>PKD1</i>  | p.Q164R  |
| CM074643 |             | <i>ABCA3</i> | p.T1423I |
| CM064939 | rs117603931 | <i>ABCA3</i> | p.R288K  |
| CM102171 | rs145087575 | <i>ABCA3</i> | p.D123N  |
| CM981247 | rs104895097 | <i>MEFV</i>  | p.R761H  |
| CM981246 | rs61732874  | <i>MEFV</i>  | p.A744S  |
| CM970914 | rs28940579  | <i>MEFV</i>  | p.V726A  |
| CM123814 | rs545517350 | <i>MEFV</i>  | p.R717H  |
| CM012154 | rs104895096 | <i>MEFV</i>  | p.V704I  |
| CM981245 | rs104895094 | <i>MEFV</i>  | p.K695R  |
| CM981244 | rs104895090 | <i>MEFV</i>  | p.T681I  |
| CM990839 | rs28940580  | <i>MEFV</i>  | p.M680I  |
| CM970911 | rs28940580  | <i>MEFV</i>  | p.M680I  |
| CM012152 | rs104895088 | <i>MEFV</i>  | p.G678E  |
| CM001237 | rs104895087 | <i>MEFV</i>  | p.S675N  |
| CM014209 | rs104895085 | <i>MEFV</i>  | p.R653H  |
| CM045304 | rs104895128 | <i>MEFV</i>  | p.G632S  |
| CM132562 |             | <i>MEFV</i>  | p.T577S  |

|          |             |               |         |
|----------|-------------|---------------|---------|
| CM132560 |             | <i>MEFV</i>   | p.T577N |
| CM068192 | rs104895168 | <i>MEFV</i>   | p.G514E |
| CM981243 | rs104895083 | <i>MEFV</i>   | p.F479L |
| CM055427 | rs104895104 | <i>MEFV</i>   | p.E474K |
| CM077597 | rs104895173 | <i>MEFV</i>   | p.V469L |
| CM060334 | rs104895151 | <i>MEFV</i>   | p.A457V |
| CM077595 | rs11466026  | <i>MEFV</i>   | p.Q440E |
| CM123644 |             | <i>MEFV</i>   | p.L372P |
| CM041800 | rs104895110 | <i>MEFV</i>   | p.E319K |
| CM055424 | rs104895119 | <i>MEFV</i>   | p.P283L |
| CM012151 | rs104895080 | <i>MEFV</i>   | p.E230K |
| CM082935 | rs104895190 | <i>MEFV</i>   | p.R143P |
| CM012149 | rs61754767  | <i>MEFV</i>   | p.R42W  |
| CM043483 | rs74892550  | <i>DNASE1</i> | p.V185I |
| CM993357 |             | <i>PMM2</i>   | p.P69S  |
| CM981605 |             | <i>PMM2</i>   | p.A233T |
| CM065149 | rs148904556 | <i>ERCC4</i>  | p.S3L   |
| CM065148 | rs61760160  | <i>ERCC4</i>  | p.P6S   |

|          |             |               |          |
|----------|-------------|---------------|----------|
| CM980616 |             | <i>ERCC4</i>  | p.R490Q  |
| CM980619 |             | <i>ERCC4</i>  | p.I529T  |
| CM053074 | rs63750457  | <i>ABCC6</i>  | p.R1164Q |
| CM073960 | rs72657689  | <i>ABCC6</i>  | p.A950T  |
| CM073952 | rs72653801  | <i>ABCC6</i>  | p.T944I  |
| CM080010 |             | <i>ABCC6</i>  | p.N793K  |
| CM073964 | rs72653792  | <i>ABCC6</i>  | p.V787I  |
| CM054643 | rs72653791  | <i>ABCC6</i>  | p.A781V  |
| CM062378 | rs72653757  | <i>ABCC6</i>  | p.L252F  |
| CM051234 |             | <i>UMOD</i>   | p.K307T  |
| CM118885 |             | <i>UMOD</i>   | p.E34K   |
| CM034834 | rs149868979 | <i>SCNN1B</i> | p.R563Q  |
| CM045468 | rs188536989 | <i>SCNN1B</i> | p.P592S  |
| CM101748 | rs267606831 | <i>FUS</i>    | p.G507D  |
| CM102461 |             | <i>FUS</i>    | p.K510E  |
| CM091087 | rs121909667 | <i>FUS</i>    | p.H517Q  |
| CM091091 | rs121909671 | <i>FUS</i>    | p.R521H  |
| CM055112 | rs104895479 | <i>NOD2</i>   | p.R587C  |

|           |             |                 |          |
|-----------|-------------|-----------------|----------|
| CM093286  | rs151332923 | <i>RPGRIP1L</i> | p.R1236C |
| CM093285  |             | <i>RPGRIP1L</i> | p.R937L  |
| CM093284  | rs145572901 | <i>RPGRIP1L</i> | p.V647I  |
| CM093282  |             | <i>RPGRIP1L</i> | p.S199G  |
| CM122043  |             | <i>BBS2</i>     | p.R403C  |
| CM109954  | rs560910758 | <i>BBS2</i>     | p.Y89C   |
| CM127055  | rs147200024 | <i>SLC12A3</i>  | p.A13P   |
| CM981827  |             | <i>SLC12A3</i>  | p.A226T  |
| CM002107  | rs79351185  | <i>SLC12A3</i>  | p.A569V  |
| CM088268  |             | <i>SLC12A3</i>  | p.V782M  |
| CM075009  | rs186979818 | <i>SLC12A3</i>  | p.R977Q  |
| CM130828  | rs373092349 | <i>SLC12A3</i>  | p.V983I  |
| CM1110136 | rs281865495 | <i>TK2</i>      | p.T188A  |
| CM064340  | rs142291440 | <i>TK2</i>      | p.N93S   |
| CM094574  | rs281865489 | <i>TK2</i>      | p.R90C   |
| CM125152  |             | <i>LCAT</i>     | p.P430L  |
| CM065994  |             | <i>CDH1</i>     | p.T118R  |
| CM072927  |             | <i>CDH1</i>     | p.T599S  |

|          |             |                 |          |
|----------|-------------|-----------------|----------|
| CM100179 | rs267606621 | <i>AARS</i>     | p.R329H  |
| CM133710 | rs34777958  | <i>DNAAF1</i>   | p.T590M  |
| CM112298 | rs387906918 | <i>CDTI</i>     | p.A66T   |
| CM095387 | rs201944035 | <i>APRT</i>     | p.A116T  |
| CM114657 |             | <i>APRT</i>     | p.L33P   |
| CM950544 | rs78127134  | <i>GALNS</i>    | p.V488M  |
| CM054745 |             | <i>GALNS</i>    | p.S470P  |
| CM980821 |             | <i>GALNS</i>    | p.L395V  |
| CM042060 |             | <i>GALNS</i>    | p.D388N  |
| CM980820 | rs150734270 | <i>GALNS</i>    | p.R376Q  |
| CM042058 |             | <i>GALNS</i>    | p.P357L  |
| CM042054 |             | <i>GALNS</i>    | p.G23R   |
| CM086800 | rs121434541 | <i>CDH15</i>    | p.A122V  |
| CM041446 |             | <i>SPG7</i>     | p.A10S   |
| CM062833 |             | <i>MC1R</i>     | p.R223Q  |
| CM102685 | rs387906971 | <i>PRPF8</i>    | p.S2118F |
| CM993195 | rs121965062 | <i>SERPINF2</i> | p.V411M  |
| CM086530 |             | <i>ASPA</i>     | p.I226T  |

|          |             |               |         |
|----------|-------------|---------------|---------|
| CM962726 | rs372635387 | <i>CHRNE</i>  | p.G13R  |
| CM003232 | rs62637015  | <i>AIPL1</i>  | p.R302L |
| CM118334 |             | <i>ACADVL</i> | p.F113L |
| CM061631 |             | <i>ACADVL</i> | p.A161T |
| CM101566 | rs398123091 | <i>ACADVL</i> | p.G222R |
| CM146324 |             | <i>ACADVL</i> | p.G222R |
| CM990107 | rs2230180   | <i>ACADVL</i> | p.E534K |
| CM990108 | rs148584617 | <i>ACADVL</i> | p.R615Q |
| CM055562 |             | <i>TP53</i>   | p.P309S |
| CM993905 | rs55819519  | <i>TP53</i>   | p.R290H |
| CM065493 |             | <i>TP53</i>   | p.R290L |
| CM103211 | rs146340390 | <i>TP53</i>   | p.P222L |
| CM070297 |             | <i>TP53</i>   | p.V197M |
| CM984589 | rs371524413 | <i>TP53</i>   | p.R156H |
| CM134053 | rs11540654  | <i>TP53</i>   | p.R110H |
| CM961375 | rs534447939 | <i>TP53</i>   | p.P82L  |
| CM074603 | rs201753350 | <i>TP53</i>   | p.V31I  |
| CM002033 | rs61749664  | <i>GUCY2D</i> | p.L41F  |



|          |             |                  |          |
|----------|-------------|------------------|----------|
| CM078221 | rs138836357 | <i>GUCY2D</i>    | p.R365W  |
| CM002037 | rs61749754  | <i>GUCY2D</i>    | p.R540C  |
| CM057701 | rs535800696 | <i>GUCY2D</i>    | p.R1029S |
| CM114693 |             | <i>RANGRF</i>    | p.E83D   |
| CM012931 |             | <i>ELAC2</i>     | p.G806R  |
| CM012928 | rs148419785 | <i>ELAC2</i>     | p.R211Q  |
| CM004108 |             | <i>PMP22</i>     | p.S149R  |
| CM983965 | rs377335295 | <i>PMP22</i>     | p.V30M   |
| CM077981 | rs55916807  | <i>TNFRSF13B</i> | p.R72H   |
| CM065434 |             | <i>RAI1</i>      | p.S1212G |
| CM054094 | rs104894633 | <i>RAI1</i>      | p.S1808N |
| CM061218 | rs70937019  | <i>SREBF1</i>    | p.T226M  |
| CM122178 |             | <i>ALDH3A2</i>   | p.R228H  |
| CM000781 | rs199474757 | <i>NF1</i>       | p.Y491C  |
| CM000808 | rs199474766 | <i>NF1</i>       | p.I1584V |
| CM950852 | rs199474793 | <i>NF1</i>       | p.T2610A |
| CM043592 | rs149585781 | <i>TCAP</i>      | p.R153H  |
| CM105905 |             | <i>KRT9</i>      | p.M157K  |

|           |             |               |          |
|-----------|-------------|---------------|----------|
| CM983347  | rs58730926  | <i>KRT17</i>  | p.R94C   |
| CM107150  |             | <i>JUP</i>    | p.T427M  |
| CM130012  |             | <i>FKBP10</i> | p.P136L  |
| CM134712  |             | <i>FKBP10</i> | p.I230T  |
| CM066109  | rs116420871 | <i>KLHL10</i> | p.Q216P  |
| CM076546  | rs113994139 | <i>STAT3</i>  | p.V637M  |
| CM003005  |             | <i>NAGLU</i>  | p.G82D   |
| CM053339  |             | <i>NAGLU</i>  | p.A246P  |
| CM990290  | rs397509269 | <i>BRCA1</i>  | p.Q1785H |
| CM087389  | rs397509215 | <i>BRCA1</i>  | p.Y1666H |
| CM0910783 | rs80357379  | <i>BRCA1</i>  | p.Y1522C |
| CM995146  |             | <i>BRCA1</i>  | p.G1205R |
| CM065006  | rs55725337  | <i>BRCA1</i>  | p.G1201S |
| CM980226  | rs397509037 | <i>BRCA1</i>  | p.V1047A |
| CM980225  | rs397509034 | <i>BRCA1</i>  | p.T1025I |
| CM042675  | rs56321129  | <i>BRCA1</i>  | p.M1008V |
| CM980223  | rs397508994 | <i>BRCA1</i>  | p.L892S  |
| CM042672  | rs4986845   | <i>BRCA1</i>  | p.N723D  |

|           |             |               |         |
|-----------|-------------|---------------|---------|
| CM031942  | rs397508934 | <i>BRCA1</i>  | p.P684S |
| CM031941  | rs397508925 | <i>BRCA1</i>  | p.N656S |
| CM995147  | rs397508918 | <i>BRCA1</i>  | p.C644W |
| CM031940  | rs397508906 | <i>BRCA1</i>  | p.T582A |
| CM031939  | rs397508895 | <i>BRCA1</i>  | p.T557A |
| CM107498  | rs56272539  | <i>BRCA1</i>  | p.R504H |
| CM065005  | rs28897676  | <i>BRCA1</i>  | p.R496C |
| CM960168  | rs397508849 | <i>BRCA1</i>  | p.E421G |
| CM045129  | rs397509062 | <i>BRCA1</i>  | p.S114P |
| CM021951  | rs80357033  | <i>BRCA1</i>  | p.D67E  |
| CM994572  | rs397508897 | <i>BRCA1</i>  | p.K56R  |
| CM1212124 | rs147390654 | <i>SLC4A1</i> | p.R180H |
| CM011816  | rs28929480  | <i>SLC4A1</i> | p.E90K  |
| CM971384  |             | <i>SLC4A1</i> | p.L73M  |
| CM930673  | rs45562031  | <i>SLC4A1</i> | p.E40K  |
| CM077189  |             | <i>GRN</i>    | p.R177H |
| CM134357  | rs373885474 | <i>GRN</i>    | p.T409M |
| CM071798  | rs63750130  | <i>GRN</i>    | p.R432C |

|          |             |               |          |
|----------|-------------|---------------|----------|
| CM100610 | rs78299130  | <i>ITGA2B</i> | p.T650M  |
| CM111089 | rs281864910 | <i>ITGA2B</i> | p.S503N  |
| CM000020 |             | <i>ITGA2B</i> | p.P176L  |
| HM060006 |             | <i>ITGA2B</i> | p.P157H  |
| CM125429 |             | <i>ITGA2B</i> | p.P76A   |
| CM020737 | rs63750959  | <i>MAPT</i>   | p.R5H    |
| CM014799 | rs63751249  | <i>MAPT</i>   | p.I260V  |
| CM971330 |             | <i>SGCA</i>   | p.P30L   |
| CM061974 | rs60407644  | <i>SGCA</i>   | p.A53T   |
| CM971339 |             | <i>SGCA</i>   | p.I124T  |
| CM971340 | rs372210292 | <i>SGCA</i>   | p.E137K  |
| CM031358 | rs574376340 | <i>SGCA</i>   | p.R181C  |
| CM083140 |             | <i>SGCA</i>   | p.S215F  |
| CM070735 | rs72656329  | <i>COL1A1</i> | p.G1178V |
| CM860006 | rs72656324  | <i>COL1A1</i> | p.G1166C |
| CM070732 | rs72648332  | <i>COL1A1</i> | p.G431V  |
| CM070696 | rs72648317  | <i>COL1A1</i> | p.G392E  |
| CM941952 | rs72667032  | <i>COL1A1</i> | p.P205A  |

|           |             |               |         |
|-----------|-------------|---------------|---------|
| CM117851  | rs151171179 | <i>COL1A1</i> | p.G26D  |
| CM130726  |             | <i>MKS1</i>   | p.T62A  |
| CM104926  |             | <i>CA4</i>    | p.A12T  |
| CM072913  | rs121434552 | <i>CA4</i>    | p.R69H  |
| CM104401  | rs61735357  | <i>GHI</i>    | p.F51Y  |
| CM072924  | rs121912424 | <i>CD79B</i>  | p.G137S |
| CM051940  | rs147750704 | <i>KCNJ2</i>  | p.V93I  |
| CM070957  | rs199473654 | <i>KCNJ2</i>  | p.G146S |
| CM124975  |             | <i>GALK1</i>  | p.F275Y |
| CM060501  | rs201600711 | <i>UNC13D</i> | p.R587H |
| CM060506  | rs202020396 | <i>UNC13D</i> | p.S290L |
| CM097547  | rs17849241  | <i>SOCS3</i>  | p.F136L |
| HM090034  | rs376685205 | <i>GAA</i>    | p.R168Q |
| CM066830  |             | <i>GAA</i>    | p.P266S |
| CM1211929 |             | <i>GAA</i>    | p.P397L |
| CM040063  |             | <i>GAA</i>    | p.G607D |
| HM090033  |             | <i>GAA</i>    | p.E762K |
| CM129631  |             | <i>GAA</i>    | p.D774N |

|           |             |              |          |
|-----------|-------------|--------------|----------|
| CM971371  | rs144143780 | <i>SGSH</i>  | p.Q380R  |
| CM020184  |             | <i>SGSH</i>  | p.P288S  |
| CM971358  |             | <i>SGSH</i>  | p.G122R  |
| CM128236  |             | <i>SGSH</i>  | p.A30P   |
| CM061222  | rs199580307 | <i>TGIF1</i> | p.V126A  |
| CM001354  | rs121909068 | <i>TGIF1</i> | p.T151A  |
| CM004614  |             | <i>MC2R</i>  | p.H139Y  |
| CM950791  |             | <i>MC2R</i>  | p.I44M   |
| CM1211093 |             | <i>GATA6</i> | p.P73L   |
| CM107170  | rs387906816 | <i>GATA6</i> | p.S184N  |
| CM109536  |             | <i>NPCI</i>  | p.L1106P |
| CM032645  |             | <i>NPCI</i>  | p.R1059Q |
| CM068136  | rs34084984  | <i>NPCI</i>  | p.N961S  |
| CM100221  |             | <i>NPCI</i>  | p.I923V  |
| CM053348  |             | <i>NPCI</i>  | p.K576R  |
| CM032624  | rs138184115 | <i>NPCI</i>  | p.A521S  |
| CM081362  |             | <i>NPCI</i>  | p.P401L  |
| CM053354  |             | <i>NPCI</i>  | p.R372W  |

|           |             |             |         |
|-----------|-------------|-------------|---------|
| CM081364  |             | <i>NPC1</i> | p.A3T   |
| CM0910201 | rs151024019 | <i>DSC2</i> | p.L732V |
| CM0910200 |             | <i>DSC2</i> | p.I603T |
| CM108495  | rs368299411 | <i>DSC2</i> | p.T340A |
| CM132706  |             | <i>DSC2</i> | p.N194K |
| CM074775  | rs144799937 | <i>DSC2</i> | p.E102K |
| CM115373  |             | <i>DSG2</i> | p.P925S |
| CM003481  |             | <i>TTR</i>  | p.V48M  |
| CM098274  |             | <i>TTR</i>  | p.G77R  |
| CM910377  | rs121918091 | <i>TTR</i>  | p.F84L  |
| CM078470  |             | <i>TTR</i>  | p.F84L  |
| CM951254  |             | <i>TTR</i>  | p.I88L  |
| CM910617  | rs121918085 | <i>TTR</i>  | p.I88L  |
| CM035092  |             | <i>TTR</i>  | p.A101T |
| CM078471  |             | <i>TTR</i>  | p.A101V |
| CM014120  |             | <i>TTR</i>  | p.E112K |
| CM941341  | rs121918089 | <i>TTR</i>  | p.I127V |
| CM900217  | rs267607159 | <i>TTR</i>  | p.A129T |

|           |             |               |          |
|-----------|-------------|---------------|----------|
| CM900218  | rs121918075 | <i>TTR</i>    | p.Y134C  |
| CM900219  | rs76992529  | <i>TTR</i>    | p.V142I  |
| CM076573  | rs144965179 | <i>TTR</i>    | p.N144S  |
| CM134056  |             | <i>ATP5A1</i> | p.R329C  |
| CM132397  | rs375653841 | <i>LIPG</i>   | p.N52S   |
| CM132398  | rs61729804  | <i>LIPG</i>   | p.P73L   |
| CM132395  | rs181279169 | <i>LIPG</i>   | p.R389Q  |
| CM100518  | rs377767345 | <i>SMAD4</i>  | p.G352E  |
| CM1010106 |             | <i>FECH</i>   | p.R164W  |
| CM052897  |             | <i>MC4R</i>   | p.I317V  |
| CM085531  | rs138281308 | <i>MC4R</i>   | p.F202L  |
| CM030690  | rs121913563 | <i>MC4R</i>   | p.A175T  |
| CM032285  | rs13447328  | <i>MC4R</i>   | p.V95I   |
| CM035773  |             | <i>MC4R</i>   | p.R18L   |
| CM061843  |             | <i>MC4R</i>   | p.R18H   |
| CM035774  | rs142837166 | <i>MC4R</i>   | p.R7H    |
| CM130999  |             | <i>ZNF407</i> | p.Y460C  |
| CM131000  |             | <i>ZNF407</i> | p.P1195A |



|          |             |                |          |
|----------|-------------|----------------|----------|
| CM112153 |             | <i>ELANE</i>   | p.A131T  |
| CM041339 | rs17216656  | <i>ELANE</i>   | p.V219I  |
| CM991152 |             | <i>STK11</i>   | p.K108R  |
| CM087675 |             | <i>STK11</i>   | p.A420T  |
| CM119917 | rs146550489 | <i>TICAM1</i>  | p.S186L  |
| CM120664 |             | <i>C3</i>      | p.V1658A |
| CM108968 |             | <i>C3</i>      | p.V762I  |
| CM950700 | rs182552223 | <i>INSR</i>    | p.T858A  |
| CM121353 |             | <i>STXBP2</i>  | p.P334L  |
| CM096296 | rs121918540 | <i>STXBP2</i>  | p.P477L  |
| CM090117 |             | <i>ANGPTL4</i> | p.G77R   |
| CM020733 | rs5931      | <i>LDLR</i>    | p.G2R    |
| CM057550 |             | <i>LDLR</i>    | p.G2R    |
| CM094082 | rs562712652 | <i>LDLR</i>    | p.D25N   |
| CM994424 | rs137853960 | <i>LDLR</i>    | p.A50T   |
| CM013555 |             | <i>LDLR</i>    | p.P84S   |
| CM970871 |             | <i>LDLR</i>    | p.Q92E   |
| CM055378 |             | <i>LDLR</i>    | p.G98S   |

|           |             |             |         |
|-----------|-------------|-------------|---------|
| CM002043  |             | <i>LDLR</i> | p.E113K |
| CM044657  |             | <i>LDLR</i> | p.S123T |
| CM024115  |             | <i>LDLR</i> | p.S130T |
| CM055395  |             | <i>LDLR</i> | p.V145A |
| CM103809  |             | <i>LDLR</i> | p.D172E |
| CM094959  |             | <i>LDLR</i> | p.S195N |
| CM012393  |             | <i>LDLR</i> | p.F200L |
| CM981184  | rs201384282 | <i>LDLR</i> | p.G219D |
| CM012394  | rs200990725 | <i>LDLR</i> | p.R257W |
| CM983993  |             | <i>LDLR</i> | p.H285Q |
| CM920436  |             | <i>LDLR</i> | p.K311R |
| CM071840  | rs72658858  | <i>LDLR</i> | p.G314R |
| CM983995  | rs72658860  | <i>LDLR</i> | p.G324S |
| CM920441  |             | <i>LDLR</i> | p.D342E |
| CM920442  |             | <i>LDLR</i> | p.G343S |
| CM013563  | rs370471092 | <i>LDLR</i> | p.E353K |
| CM1212203 |             | <i>LDLR</i> | p.D360H |
| CM013564  | rs138315511 | <i>LDLR</i> | p.D362A |

|          |             |             |         |
|----------|-------------|-------------|---------|
| CM132114 |             | <i>LDLR</i> | p.C377S |
| CM116939 |             | <i>LDLR</i> | p.D386E |
| CM950761 |             | <i>LDLR</i> | p.G396S |
| CM013566 |             | <i>LDLR</i> | p.S397T |
| CM002349 |             | <i>LDLR</i> | p.D415G |
| CM014577 |             | <i>LDLR</i> | p.T434M |
| CM127659 |             | <i>LDLR</i> | p.S486G |
| CM116941 |             | <i>LDLR</i> | p.R513K |
| CM045619 |             | <i>LDLR</i> | p.N515S |
| CM061089 |             | <i>LDLR</i> | p.T538S |
| CM013577 |             | <i>LDLR</i> | p.S572N |
| CM055370 | rs201971888 | <i>LDLR</i> | p.D589N |
| CM055381 | rs148181903 | <i>LDLR</i> | p.V613I |
| CM970897 |             | <i>LDLR</i> | p.P649L |
| CM973627 |             | <i>LDLR</i> | p.T659P |
| CM020732 |             | <i>LDLR</i> | p.S673R |
| CM055380 | rs368838866 | <i>LDLR</i> | p.G701S |

|          |             |               |         |
|----------|-------------|---------------|---------|
| CM055374 | rs200142970 | <i>LDLR</i>   | p.R751Q |
| CM014582 |             | <i>LDLR</i>   | p.E781D |
| CM000418 |             | <i>LDLR</i>   | p.V797L |
| CM055394 |             | <i>LDLR</i>   | p.V836I |
| CM091465 | rs13306505  | <i>LDLR</i>   | p.A860V |
| CM000389 |             | <i>GCDH</i>   | p.Y113H |
| CM980852 |             | <i>GCDH</i>   | p.A122V |
| CM000390 |             | <i>GCDH</i>   | p.R128Q |
| CM980857 |             | <i>GCDH</i>   | p.R161Q |
| CM131394 | rs375357230 | <i>GCDH</i>   | p.D220N |
| CM960711 | rs121434373 | <i>GCDH</i>   | p.R227P |
| CM980872 |             | <i>GCDH</i>   | p.A349T |
| HM0711   | rs141956294 | <i>NOTCH3</i> | p.S978R |
| CM067478 | rs201992877 | <i>NXNLI</i>  | p.K92R  |
| CM036014 | rs121912556 | <i>INSL3</i>  | p.R102H |
| CM002797 | rs104894697 | <i>INSL3</i>  | p.P93L  |
| CM030430 | rs104894670 | <i>CRLF1</i>  | p.R81H  |
| CM074245 |             | <i>GDF1</i>   | p.P312T |

|          |             |               |          |
|----------|-------------|---------------|----------|
| CM074247 |             | <i>GDF1</i>   | p.S309P  |
| CM074244 |             | <i>GDF1</i>   | p.G262S  |
| CM074242 |             | <i>GDF1</i>   | p.R68H   |
| CM010452 |             | <i>SLC7A9</i> | p.A382T  |
| CM068440 |             | <i>SLC7A9</i> | p.V375I  |
| CM023824 | rs121908486 | <i>SLC7A9</i> | p.P261L  |
| HM070070 |             | <i>SLC7A9</i> | p.I120L  |
| CM010443 |             | <i>SLC7A9</i> | p.A70V   |
| CM101328 |             | <i>NPHS1</i>  | p.R586G  |
| CM044922 | rs116617171 | <i>NPHS1</i>  | p.A22V   |
| CM098232 | rs143398211 | <i>RYR1</i>   | p.G2160S |
| CM064244 | rs193922873 | <i>RYR1</i>   | p.G4820W |
| CM065111 | rs139297205 | <i>DLL3</i>   | p.G269R  |
| CM041083 | rs104894722 | <i>TGFBI</i>  | p.C223R  |
| CM004368 |             | <i>RPS19</i>  | p.P47L   |
| CM993207 |             | <i>RPS19</i>  | p.R56Q   |
| CM004282 |             | <i>RPS19</i>  | p.R62Q   |
| CM993208 |             | <i>RPS19</i>  | p.R101H  |

|           |             |                |         |
|-----------|-------------|----------------|---------|
| CM108601  |             | <i>RPS19</i>   | p.L107R |
| CM043809  | rs121918397 | <i>APOE</i>    | p.R163H |
| CM930032  | rs5122      | <i>APOC2</i>   | p.E60K  |
| CM071086  | rs80356462  | <i>SIX5</i>    | p.A296T |
| CM054727  |             | <i>FKRP</i>    | p.R244H |
| CM013808  |             | <i>FKRP</i>    | p.P316R |
| CM057658  | rs61748438  | <i>CRX</i>     | p.V66I  |
| CM970399  | rs61748459  | <i>CRX</i>     | p.V242M |
| CM057657  | rs281865203 | <i>CRX</i>     | p.T273M |
| CM983740  | rs1800021   | <i>FUT2</i>    | p.I25V  |
| CM983742  | rs1800025   | <i>FUT2</i>    | p.D172N |
| CM970544  | rs56131151  | <i>FUT1</i>    | p.E348K |
| CM041812  | rs28940306  | <i>MYH14</i>   | p.L976F |
| CM042373  |             | <i>KLK12</i>   | p.M245I |
| CM1210280 | rs61747407  | <i>NLRP7</i>   | p.A494T |
| CM0910151 |             | <i>TNNI3</i>   | p.A91T  |
| CM970159  | rs121964887 | <i>AVP</i>     | p.G54V  |
| CM107636  | rs144734280 | <i>SLC4A11</i> | p.V575M |

|          |             |                |         |
|----------|-------------|----------------|---------|
| CM081815 |             | <i>SLC4A11</i> | p.A160T |
| CM060409 | rs368682034 | <i>PANK2</i>   | p.R264Q |
| HM070088 | rs56362942  | <i>PRNP</i>    | p.S97N  |
| CM003608 |             | <i>PRNP</i>    | p.I138M |
| CM104613 |             | <i>PRNP</i>    | p.D167N |
| CM001314 |             | <i>PRNP</i>    | p.V203I |
| CM125973 |             | <i>PRNP</i>    | p.I215V |
| CM004523 |             | <i>PRNP</i>    | p.M232T |
| CM010926 | rs149051148 | <i>MKKS</i>    | p.R518H |
| CM033397 | rs142327258 | <i>MKKS</i>    | p.D492N |
| CM021299 | rs137853909 | <i>MKKS</i>    | p.I339V |
| CM010922 |             | <i>MKKS</i>    | p.S236P |
| CM118560 |             | <i>JAG1</i>    | p.G309R |
| CM993738 |             | <i>JAG1</i>    | p.L79H  |
| CM023735 | rs183974372 | <i>JAG1</i>    | p.V45L  |
| CM012661 | rs41400249  | <i>THBD</i>    | p.R403K |
| CM103430 |             | <i>THBD</i>    | p.A236G |
| CM132871 |             | <i>THBD</i>    | p.D126Y |

|           |             |               |         |
|-----------|-------------|---------------|---------|
| CM103429  |             | <i>THBD</i>   | p.D34E  |
| CM083794  | rs201716527 | <i>VSXI</i>   | p.N151S |
| CM072951  | rs118203966 | <i>CHMP4B</i> | p.E161K |
| CM970700  |             | <i>GSS</i>    | p.Y270C |
| CM073153  | rs140740776 | <i>JPH2</i>   | p.G505S |
| CM010325  |             | <i>HNF4A</i>  | p.R141Q |
| CM900008  | rs121908738 | <i>ADA</i>    | p.P274L |
| CM950013  | rs61732239  | <i>ADA</i>    | p.R142Q |
| CM128871  | rs149215094 | <i>VAPB</i>   | p.V234I |
| CM033966  |             | <i>EDN3</i>   | p.E48D  |
| CM1211796 | rs112433432 | <i>GATA5</i>  | p.F159L |
| CM108145  |             | <i>COL9A3</i> | p.N324I |
| CM094469  | rs281865068 | <i>CHRNA4</i> | p.R336H |
| CM095345  | rs117067974 | <i>KCNQ2</i>  | p.E515D |
| CM941288  | rs121912444 | <i>SOD1</i>   | p.A5T   |
| CM951178  |             | <i>SOD1</i>   | p.V8E   |
| CM983780  |             | <i>SOD1</i>   | p.L68R  |
| CM124762  |             | <i>SOD1</i>   | p.D91N  |



|          |             |              |         |
|----------|-------------|--------------|---------|
| CM983681 |             | <i>SOD1</i>  | p.D91V  |
| CM011009 | rs121912459 | <i>SOD1</i>  | p.D97N  |
| CM961345 |             | <i>SOD1</i>  | p.E101K |
| CM993507 | rs16991652  | <i>KCNE2</i> | p.Q9E   |
| CM097710 | rs142153692 | <i>KCNE2</i> | p.V14I  |
| CM097714 | rs199473365 | <i>KCNE2</i> | p.R77Q  |
| CM097715 | rs74424227  | <i>KCNE2</i> | p.E94G  |
| CM097709 | rs142511345 | <i>KCNE1</i> | p.T125M |
| CM012775 | rs77442996  | <i>KCNE1</i> | p.V109I |
| CM057110 | rs199473351 | <i>KCNE1</i> | p.R36H  |
| CM122941 |             | <i>KCNE1</i> | p.G25V  |
| CM097698 | rs144917638 | <i>KCNE1</i> | p.T10M  |
| CM074909 | rs199473348 | <i>KCNE1</i> | p.A8V   |
| CM033356 |             | <i>CBS</i>   | p.Q526K |
| CM990352 |             | <i>CBS</i>   | p.R491C |
| CM950216 |             | <i>CBS</i>   | p.V454E |
| CM031652 |             | <i>CBS</i>   | p.R379Q |
| CM993934 |             | <i>CBS</i>   | p.A361T |

|          |             |               |          |
|----------|-------------|---------------|----------|
| CM980310 | rs267606146 | <i>CBS</i>    | p.V354M  |
| CM020261 | rs34397615  | <i>AIRE</i>   | p.P252L  |
| CM085227 |             | <i>AIRE</i>   | p.E298K  |
| CM120021 | rs373963624 | <i>ITGB2</i>  | p.P648L  |
| CM920385 | rs5030672   | <i>ITGB2</i>  | p.R586W  |
| CM900147 | rs137852610 | <i>ITGB2</i>  | p.K196T  |
| CM131317 | rs563449281 | <i>COL6A2</i> | p.D215N  |
| CM022054 | rs137852934 | <i>PRODH</i>  | p.L289M  |
| CM120052 |             | <i>GNB1L</i>  | p.R283Q  |
| CM055106 | rs532338041 | <i>CABIN1</i> | p.P1980L |
| CM110393 |             | <i>CRYBB2</i> | p.A2V    |
| CM030419 | rs137853010 | <i>CHEK2</i>  | p.R181C  |
| CM030414 | rs141568342 | <i>CHEK2</i>  | p.E64K   |
| CM045419 | rs372279458 | <i>NF2</i>    | p.N36S   |
| CM025443 |             | <i>SLC5A1</i> | p.I315L  |
| CM110176 | rs201799893 | <i>SLC5A1</i> | p.R558H  |
| CM131007 |             | <i>TIMP3</i>  | p.V108I  |
| CM032947 | rs121908675 | <i>LARGE</i>  | p.E509K  |

|           |             |                |          |
|-----------|-------------|----------------|----------|
| CM034441  |             | <i>MYH9</i>    | p.I1816V |
| CM1212500 |             | <i>TMPRSS6</i> | p.H369N  |
| CM063031  | rs138672490 | <i>PLA2G6</i>  | p.A147T  |
| CM090238  | rs144910769 | <i>PLA2G6</i>  | p.R39Q   |
| CM990119  | rs28941471  | <i>ADSL</i>    | p.R190Q  |
| CM960488  | rs61745147  | <i>CYB5R3</i>  | p.E213K  |
| CM016231  |             | <i>CYB5R3</i>  | p.M177T  |
| CM920234  | rs121965009 | <i>CYB5R3</i>  | p.V106M  |
| CM060245  |             | <i>CYB5R3</i>  | p.G76S   |
| CM056713  | rs121918186 | <i>UPK3A</i>   | p.P273L  |
| CM120676  | rs61741871  | <i>CELSR1</i>  | p.P2983A |
| CM120674  | rs199688538 | <i>CELSR1</i>  | p.R2438Q |
| CM120673  | rs12170597  | <i>CELSR1</i>  | p.A773V  |
| CM011972  | rs121908341 | <i>MLC1</i>    | p.S280L  |
| CM990186  |             | <i>ARSA</i>    | p.A466V  |
| CM940103  | rs74315466  | <i>ARSA</i>    | p.D171N  |
| CM940102  | rs74315465  | <i>ARSA</i>    | p.P169R  |
| CM940098  | rs74315461  | <i>ARSA</i>    | p.G124S  |

|           |             |              |          |
|-----------|-------------|--------------|----------|
| CM085257  | rs199476339 | <i>ARSA</i>  | p.A20D   |
| CM074502  |             | <i>SHOX</i>  | p.K181N  |
| CM950098  | rs122460153 | <i>ARSE</i>  | p.R111P  |
| CM131396  | rs2229013   | <i>KALI</i>  | p.V560I  |
| CM970797  |             | <i>KALI</i>  | p.F517L  |
| CM091807  | rs267608611 | <i>CDKL5</i> | p.N399T  |
| CM071978  |             | <i>RS1</i>   | p.I195V  |
| CM1211522 | rs138727886 | <i>PDHAI</i> | p.A136T  |
| CM127355  | rs397515549 | <i>SMS</i>   | p.F58L   |
| CM0910542 |             | <i>SMS</i>   | p.Y328C  |
| CM981524  |             | <i>PHEX</i>  | p.Y317F  |
| CM970068  | rs193205940 | <i>NROBI</i> | p.V126M  |
| CM115791  | rs151244052 | <i>DMD</i>   | p.R2524H |
| CM093707  |             | <i>CYBB</i>  | p.G408R  |
| CM980482  | rs151344473 | <i>CYBB</i>  | p.G408R  |
| CM045136  |             | <i>CYBB</i>  | p.D500Y  |
| CM990457  | rs151344487 | <i>CYBB</i>  | p.W516R  |
| CM083619  |             | <i>CYBB</i>  | p.W516R  |

|          |             |               |         |
|----------|-------------|---------------|---------|
| CM003474 | rs62635004  | <i>RPGR</i>   | p.G436D |
| CM992211 | rs62640587  | <i>RPGR</i>   | p.I289V |
| CM070254 |             | <i>RPGR</i>   | p.I195V |
| CM056981 |             | <i>OTC</i>    | p.A12T  |
| CM910273 | rs68031618  | <i>OTC</i>    | p.R26Q  |
| CM950870 | rs72554307  | <i>OTC</i>    | p.R40C  |
| CM941115 | rs72554308  | <i>OTC</i>    | p.R40H  |
| CM062942 | rs67939655  | <i>OTC</i>    | p.N47T  |
| CM961052 | rs72554356  | <i>OTC</i>    | p.T125M |
| CM065337 |             | <i>NDP</i>    | p.G112E |
| CM070250 |             | <i>RP2</i>    | p.R211H |
| CM113536 | rs200533370 | <i>SYN1</i>   | p.T567A |
| CM002951 |             | <i>ELK1</i>   | p.T108A |
| CM041105 | rs28933691  | <i>ZNF81</i>  | p.S179N |
| CM951327 | rs146220228 | <i>WAS</i>    | p.E131K |
| CM133803 |             | <i>CCDC22</i> | p.R128Q |
| CM133804 |             | <i>CCDC22</i> | p.R321W |
| CM078706 |             | <i>FOXP3</i>  | p.C424Y |

|          |             |                 |         |
|----------|-------------|-----------------|---------|
| CM066087 |             | <i>FOXP3</i>    | p.T108M |
| CM061655 |             | <i>BMP15</i>    | p.R61Q  |
| CM061656 |             | <i>BMP15</i>    | p.R76H  |
| CM092909 | rs371418883 | <i>BMP15</i>    | p.R138H |
| CM061657 |             | <i>BMP15</i>    | p.R206H |
| CM041254 | rs104894765 | <i>BMP15</i>    | p.Y235C |
| CM061652 |             | <i>BMP15</i>    | p.I243V |
| CM092712 |             | <i>HSD17B10</i> | p.P210S |
| CM031196 | rs28935476  | <i>HSD17B10</i> | p.L122V |
| CM020698 | rs28935498  | <i>FGD1</i>     | p.P312L |
| CM114502 | rs185504937 | <i>ALAS2</i>    | p.R218H |
| CM001957 | rs201934623 | <i>AR</i>       | p.P392S |
| CM056297 |             | <i>AR</i>       | p.S413N |
| CM003403 |             | <i>AR</i>       | p.G492S |
| CM920071 | rs137852569 | <i>AR</i>       | p.A597T |
| CM122442 |             | <i>EDA</i>      | p.G45D  |
| HM070090 |             | <i>EDA</i>      | p.L51Q  |
| CM122443 |             | <i>EDA</i>      | p.T57A  |

|           |             |               |          |
|-----------|-------------|---------------|----------|
| CM960503  | rs132630309 | <i>EDA</i>    | p.R69L   |
| CM0910972 |             | <i>EDA</i>    | p.G165A  |
| CM942063  |             | <i>IL2RG</i>  | p.W240R  |
| CM973182  |             | <i>GJB1</i>   | p.V189I  |
| CM003316  |             | <i>GJB1</i>   | p.E208G  |
| CM024529  |             | <i>GJB1</i>   | p.I213V  |
| CM072910  | rs137853272 | <i>BRWD3</i>  | p.K1596E |
| CM111238  |             | <i>PCDH19</i> | p.F206Y  |
| CM118953  |             | <i>PCDH19</i> | p.V72G   |
| CM040692  |             | <i>BTK</i>    | p.G584E  |
| CM960210  |             | <i>BTK</i>    | p.R544K  |
| HM971744  | rs111422676 | <i>GLA</i>    | p.R363H  |
| CM023806  |             | <i>GLA</i>    | p.R363C  |
| CM096038  |             | <i>GLA</i>    | p.R356Q  |
| CM025441  | rs149391489 | <i>GLA</i>    | p.S126G  |
| CM051521  |             | <i>GLA</i>    | p.E103Q  |
| CM024288  |             | <i>GLA</i>    | p.M72I   |

|           |             |                 |          |
|-----------|-------------|-----------------|----------|
| CM080394  |             | <i>GLA</i>      | p.F18S   |
| CM0910662 |             | <i>GLA</i>      | p.A15G   |
| CM1211995 |             | <i>GLA</i>      | p.A15P   |
| CM951199  | rs61754490  | <i>SERPINA7</i> | p.Y329F  |
| CM012343  | rs104886132 | <i>COL4A5</i>   | p.G595R  |
| CM003665  | rs104886164 | <i>COL4A5</i>   | p.P739S  |
| CM010197  | rs104886192 | <i>COL4A5</i>   | p.M898V  |
| CM100820  | rs281874709 | <i>COL4A5</i>   | p.G1000V |
| CM003670  | rs104886285 | <i>COL4A5</i>   | p.R1511H |
| CM129379  | rs104886305 | <i>COL4A5</i>   | p.S1659N |
| CM085479  |             | <i>KCNE1L</i>   | p.L65F   |
| CM040003  | rs121917813 | <i>AGTR2</i>    | p.I53F   |
| CM021242  | rs35474657  | <i>AGTR2</i>    | p.R324Q  |
| CM085768  |             | <i>ZCCHC12</i>  | p.T344I  |
| CM112387  | rs148554414 | <i>SH2D1A</i>   | p.A3S    |
| CM110891  |             | <i>SH2D1A</i>   | p.C42Y   |
| CM011446  |             | <i>OCRL</i>     | p.R334P  |
| CM056715  |             | <i>USP26</i>    | p.K734N  |



|          |             |              |         |
|----------|-------------|--------------|---------|
| CM056717 | rs145695346 | <i>USP26</i> | p.T659M |
| CM056722 |             | <i>USP26</i> | p.E500K |
| CM002623 |             | <i>HPRT1</i> | p.T124S |
| CM044230 |             | <i>HPRT1</i> | p.A192V |
| CM040505 | rs104894963 | <i>ZIC3</i>  | p.P217A |
| CM940509 | rs148060786 | <i>F9</i>    | p.R3H   |
| CM030845 |             | <i>F9</i>    | p.C18F  |
| CM001676 |             | <i>F9</i>    | p.C28G  |
| CM940432 | rs137852228 | <i>F9</i>    | p.R75Q  |
| CM045744 | rs201120367 | <i>F9</i>    | p.T84A  |
| CM000151 |             | <i>F9</i>    | p.G105D |
| CM940472 |             | <i>F9</i>    | p.I112T |
| CM940484 |             | <i>F9</i>    | p.F123Y |
| CM045148 |             | <i>F9</i>    | p.E142K |
| CM910719 |             | <i>F9</i>    | p.V153A |
| CM940540 |             | <i>F9</i>    | p.F224L |
| CM094816 | rs200608775 | <i>F9</i>    | p.V257I |
| CM950429 |             | <i>F9</i>    | p.N283D |

|          |             |               |         |
|----------|-------------|---------------|---------|
| CM940597 | rs1801202   | <i>F9</i>     | p.H303Y |
| CM045765 | rs150351950 | <i>F9</i>     | p.E323K |
| CM045753 |             | <i>F9</i>     | p.S329R |
| CM940655 |             | <i>F9</i>     | p.V374I |
| CM940740 |             | <i>F9</i>     | p.R449W |
| CM128720 |             | <i>AFF2</i>   | p.S660T |
| CM120454 | rs141720810 | <i>IDS</i>    | p.P261A |
| CM128185 |             | <i>IDS</i>    | p.G134R |
| CM960861 |             | <i>IDS</i>    | p.G134R |
| CM085353 | rs61740566  | <i>MAMLD1</i> | p.V505A |
| CM050365 |             | <i>NSDHL</i>  | p.C132W |
| CM122283 |             | <i>SLC6A8</i> | p.V629I |
| CM021046 |             | <i>ABCD1</i>  | p.M67V  |
| CM950030 | rs193922097 | <i>ABCD1</i>  | p.A141T |
| CM940037 | rs128624224 | <i>ABCD1</i>  | p.R518W |
| CM000642 |             | <i>ABCD1</i>  | p.P543L |
| CM960043 | rs201774661 | <i>ABCD1</i>  | p.S606P |
| CM064088 |             | <i>LICAM</i>  | p.A254D |

|          |             |              |         |
|----------|-------------|--------------|---------|
| CM103349 |             | <i>LICAM</i> | p.W9R   |
| CM014948 |             | <i>AVPR2</i> | p.A61V  |
| CM001624 |             | <i>AVPR2</i> | p.S127F |
| CM058038 | rs140258520 | <i>MECP2</i> | p.P419S |
| CM016262 | rs56268439  | <i>MECP2</i> | p.E397K |
| CM014902 | rs61753006  | <i>MECP2</i> | p.P388L |
| CM070192 | rs147017239 | <i>MECP2</i> | p.A358T |
| CM060328 | rs267608556 | <i>MECP2</i> | p.L328V |
| CM045661 | rs61749713  | <i>MECP2</i> | p.T196S |
| CM000744 |             | <i>MECP2</i> | p.P101L |
| CM012746 | rs137853311 | <i>FLNA</i>  | p.L656F |
| CM790001 |             | <i>G6PD</i>  | p.R463C |
| CM920290 | rs398123546 | <i>G6PD</i>  | p.R454C |
| CM920288 |             | <i>G6PD</i>  | p.E416K |
| CM920286 | rs137852335 | <i>G6PD</i>  | p.V394L |
| CM930277 | rs137852322 | <i>G6PD</i>  | p.C385R |
| CM066825 |             | <i>G6PD</i>  | p.L235F |
| CM880030 | rs1050829   | <i>G6PD</i>  | p.N126D |

|           |             |              |          |
|-----------|-------------|--------------|----------|
| CM930267  | rs5030870   | <i>G6PD</i>  | p.D113N  |
| CM082725  | rs181277621 | <i>G6PD</i>  | p.R104H  |
| CM095983  |             | <i>IKBKG</i> | p.Q183H  |
| CM080319  |             | <i>F8</i>    | p.M2218V |
| CM980717  |             | <i>F8</i>    | p.I2204T |
| CM002004  |             | <i>F8</i>    | p.E2200D |
| CM073051  |             | <i>F8</i>    | p.H2174Y |
| CM129828  | rs200433372 | <i>F8</i>    | p.G2102S |
| CM105304  |             | <i>F8</i>    | p.H1938R |
| CM080257  |             | <i>F8</i>    | p.V1892I |
| CM980703  |             | <i>F8</i>    | p.P1801A |
| CM920259  | rs137852375 | <i>F8</i>    | p.M1791T |
| CM010867  | rs151202877 | <i>F8</i>    | p.R1768H |
| CM057441  | rs374988541 | <i>F8</i>    | p.Q1764R |
| CM1212744 |             | <i>F8</i>    | p.M1730I |
| CM108718  |             | <i>F8</i>    | p.M1730V |
| CM080324  |             | <i>F8</i>    | p.S1688L |
| CM082643  |             | <i>F8</i>    | p.R1671H |

|          |             |           |          |
|----------|-------------|-----------|----------|
| CM053248 |             | <i>F8</i> | p.P1660L |
| CM083650 |             | <i>F8</i> | p.S1530T |
| CM082634 | rs186353717 | <i>F8</i> | p.V1511I |
| CM022352 |             | <i>F8</i> | p.Q1336K |
| CM062655 |             | <i>F8</i> | p.R1329H |
| CM066802 |             | <i>F8</i> | p.T1314P |
| CM083641 |             | <i>F8</i> | p.N1110Y |
| CM034807 |             | <i>F8</i> | p.H1066Y |
| CM062651 | rs149853218 | <i>F8</i> | p.H998Q  |
| HM090013 | rs199660138 | <i>F8</i> | p.D963N  |
| CM020115 |             | <i>F8</i> | p.G513S  |
| CM980680 |             | <i>F8</i> | p.R437W  |
| CM081610 |             | <i>F8</i> | p.G434D  |
| CM082631 |             | <i>F8</i> | p.R424S  |
| CM080260 |             | <i>F8</i> | p.K344Q  |
| CM105566 |             | <i>F8</i> | p.H330R  |
| CM990535 |             | <i>F8</i> | p.A315V  |

|          |             |           |         |
|----------|-------------|-----------|---------|
| CM073053 |             | <i>F8</i> | p.L296F |
| CM020413 |             | <i>F8</i> | p.E284K |
| CM950389 |             | <i>F8</i> | p.S202N |
| CM062638 |             | <i>F8</i> | p.A194T |
| CM073045 |             | <i>F8</i> | p.E132A |
| CM085394 |             | <i>F8</i> | p.L107F |
| CM103762 |             | <i>F8</i> | p.L69V  |
| CM073043 | rs187738612 | <i>F8</i> | p.V64M  |
