# Supplementary material
Source: PubMed Central journal article supplement (PMC5159764)
Supplement: ejhg2016129x2.pdf [file ejhg2016129x2.pdf]

**Supplementary Table S2.** Summary of features commonly used in bioinformatic tools to identify deleterious amino acid substitutions (AAS). Features were obtained using the SNVBox software for all datasets (CPD, DM and SNP sets). The descriptions of features were taken from the SNVBox User Manual (<http://karchinlab.org/apps/snvbox/userdoc.pdf>); for more details please refer to SNVBox<sup>25</sup>.

| <b>Feature name</b>                        | <b>Feature subset</b> | <b>Description</b>                                                                                                                                                 |
|--------------------------------------------|-----------------------|--------------------------------------------------------------------------------------------------------------------------------------------------------------------|
| AA Hydrophobicity                          | Amino acid features   | Change in hydrophobicity as a result of the AAS                                                                                                                    |
| AA Charge                                  | Amino acid features   | Change in formal charge as a result of the AAS                                                                                                                     |
| AA Volume                                  | Amino acid features   | Change in residue volume as a result of the AAS (cubic Angstroms)                                                                                                  |
| AA Polarity                                | Amino acid features   | Polarity change as a result of the AAS                                                                                                                             |
| AA Matrix                                  | Amino acid features   | Amino acid substitution scores from BLOSUM 62, PAM250, EX, Venkatarajan and Braun matrix & Miyazawa-Jernigan contact energy matrix                                 |
| AA Transition                              | Amino acid features   | Frequency of transition between two neighboring amino acids based on all human proteins in SwissProt                                                               |
| AA Grantham score                          | Amino acid features   | The Grantham distance from reference to mutation amino acid residue                                                                                                |
| AA Frequencies                             | Amino acid features   | Frequency of AAS type (e.g. alanine to glycine) in HGMD (2003), HapMap (dbSNP build 129) and COSMIC (release 38)                                                   |
| Exon Conservation                          | Exonic features       | Entire exon conservation computed from a 46-way genomic vertebrate alignment                                                                                       |
| Exon SNP Density                           | Exonic features       | Number of HapMap verified SNPs in the exon where the mutation is located divided by the length of the exon                                                         |
| Genomic multiple sequence alignments (MSA) | Genomic MSA           | Features calculated from 46-way genomic vertebrate alignments, which includes Shannon entropy and the Kullback-Leibler divergence                                  |
| Protein multiple sequence alignments (MSA) | Protein MSA           | Features calculated from multiple sequence alignment of diverse homologous proteins. Features computed include the Shannon entropy and Kullback-Leibler divergence |

|                                       |                              |                                                                                                                                                                                                                                                                    |
|---------------------------------------|------------------------------|--------------------------------------------------------------------------------------------------------------------------------------------------------------------------------------------------------------------------------------------------------------------|
| Solvent accessibility                 | Protein structure            | Prediction that wild-type residue is buried, partially buried or exposed in terms of solvent accessibility                                                                                                                                                         |
| Secondary structure                   | Protein structure            | Prediction that wild-type residue is helix, loop or strand                                                                                                                                                                                                         |
| Protein stability                     | Protein structure            | Prediction of the degree to which the wild-type residue contributes to protein stability e.g. highly stabilizing                                                                                                                                                   |
| Backbone flexibility                  | Protein structure            | Prediction of the flexibility of the backbone of the wild-type residue                                                                                                                                                                                             |
| Protein composition                   | Regional protein composition | Features based on regional amino acid composition in a 15-amino-acid-residue window centred on the AAS                                                                                                                                                             |
| UniProt annotations of human proteins | Annotated functional sites   | Includes functional sites annotated by UniProt, including binding sites (e.g. DNA, RNA, lipid, metal, carbohydrate, calcium), catalytic sites, sites of post-translational modification, localization signals, disulphide bonds, protein-protein interaction sites |
